# Supplementary material
Source: PubMed Central journal article supplement (PMC3911024)
Supplement: AEM.02853-13_zam999104989so1.pdf [file AEM.02853-13_zam999104989so1.pdf]

## Supplemental Material

**Table S1.** Primers used to screen for AX(OS)-degrading enzymes in the bifidobacterial strains tested.

| Reference sequence   | Additional entries used to make consensus                                                                               | Forward primer<br>(5' → 3') | Reverse primer<br>(5' → 3') | Amplicon length (bp) |
|----------------------|-------------------------------------------------------------------------------------------------------------------------|-----------------------------|-----------------------------|----------------------|
| <i>BL1543</i>        | AAN25334, BAJ67386, EEI80964, BAJ71924, EEQ55939, ADQ02610.                                                             | GACAATTCGTTTCGCTCAAGT       | AGCATGTCATCGGACAGTTT        | 434                  |
| <i>BL1544</i>        | AAN25335, BAJ71923, BAJ67385, ACD99106, ADQ02611, EEI80965.                                                             | TCTCTTTCTGGAACCACGAG        | CATTGGGTTGGTATTCTTCG        | 433                  |
| <i>BL0682</i>        | AAN24503, EEI80353, BAJ67558, EEQ54758.                                                                                 | CTACGCCATGACTTCTGACC        | AAAGCCTGATTGTGAGCTTG        | 402                  |
| <i>BL0181</i>        | AAN24035, EEQ55862, EFV37311, EEI80492, EEG70006, BAF40305, EDN82302, ADH01333, EEP21637, EEB22114, EFM40505, EDT45169. | CACTGGGAYCGCACCATY          | CCAGCTGGABGACTGRTAGG        | 537                  |
| <i>BL0544+BL1611</i> | AAN24368, EFV36777, BAJ70234, BAJ71854, AAN25400, EDT88515, EEI80936.                                                   | GCAACGAGYTGATGGARG          | TCCATATCSACGCCSGAG          | 451                  |
| <i>BL1138</i>        | AAN24945, EEI81164, BAJ70635, BAJ66143, ADQ01834, ACJ53056, EEQ54180, ADH00027, EFV36420.                               | ATCTGGAAAACCTCGGCTAT        | ATCCATGAACTGCACCAGAT        | 437                  |
| <i>BL1166</i>        | AAN24971, ADG99997, BAJ70606, EEQ54210, ADQ01881, EEI81196.                                                             | TATCAAGATGTGGTGCATCG        | CGTTCCACTTGTCCGAATAC        | 434                  |

**Table S2.** Primers used to sequence the putative *BL1544* gene in the bifidobacterial strains tested. <sup>a)</sup> Position in the genome of *Bifidobacterium longum* subsp. *longum* NCC2705.

| Reference sequence | PCR target <sup>a)</sup> | Forward primer<br>(5' → 3') | Reverse primer<br>(5' → 3') | Amplicon length (bp) |
|--------------------|--------------------------|-----------------------------|-----------------------------|----------------------|
| <i>BL1544_1</i>    | 1946863-1947441          | CTTGCTTGGCTCTCACTGGT        | TAATTGGAGATCCGGGACTG        | 579                  |
| <i>BL1544_2</i>    | 1947157-1947846          | AAAATTTTCGGCTAGTGCTATCG     | AGGAGTCTCACCAAGATCATCAG     | 690                  |
| <i>BL1544_3</i>    | 1947693-1948418          | TGATCCGTCATTGTATTTTGATG     | GTAAGCGTACCATTCCACTGAG      | 726                  |
| <i>BL1544_4</i>    | 1948242-1948977          | CAATTCGGACGATTTTGATAATG     | GGAAACCTTGTGCCCATG          | 736                  |
| <i>BL1544_5</i>    | 1948816-1949557          | GGTCTTGCTGATGAGAAGGAATA     | CGTCGCTCAAGTCATAGTAATCA     | 742                  |
| <i>BL1544_6</i>    | 1949391-1950087          | GTACAGTCTGGACGGTAAGCAAT     | ACATCACTGATTCCGCACATT       | 697                  |

**Table S3.** PC1, PC2, and PC3 coordinates of bifidobacterial strains in three-dimensional score plot.

| No. | Bifidobacterial strain                                                    | PC1   | PC2   | PC3   |
|-----|---------------------------------------------------------------------------|-------|-------|-------|
| 1   | <i>Bifidobacterium longum</i> subsp. <i>longum</i> BB536                  | 3.61  | -1.88 | -0.81 |
| 2   | <i>Bifidobacterium longum</i> subsp. <i>longum</i> LMG 13197 <sup>T</sup> | 4.81  | -2.12 | 0.06  |
| 3   | <i>Bifidobacterium longum</i> subsp. <i>infantis</i> LMG 11570            | -2.68 | -2.48 | -0.16 |
| 4   | <i>Bifidobacterium longum</i> subsp. <i>infantis</i> LMG 11588            | -0.43 | 2.96  | -2.07 |
| 5   | <i>Bifidobacterium longum</i> subsp. <i>longum</i> LMG 11047              | 5.15  | 3.62  | -0.26 |
| 6   | <i>Bifidobacterium longum</i> subsp. <i>longum</i> 46                     | 4.81  | -2.12 | 0.06  |
| 7   | <i>Bifidobacterium longum</i> subsp. <i>longum</i> LMG 13196              | -0.70 | -2.18 | -1.42 |
| 8   | <i>Bifidobacterium longum</i> subsp. <i>longum</i> NCC2705                | 4.81  | -2.12 | 0.06  |
| 9   | <i>Bifidobacterium longum</i> subsp. <i>longum</i> CUETM 172              | 4.61  | -2.05 | -0.27 |
| 10  | <i>Bifidobacterium longum</i> subsp. <i>longum</i> PRO-16-10              | 5.28  | -1.95 | -0.06 |
| 11  | <i>Bifidobacterium longum</i> subsp. <i>longum</i> CUETM 193              | 5.23  | 3.01  | -0.38 |
| 12  | <i>Bifidobacterium longum</i> subsp. <i>longum</i> CUETM 239              | 0.57  | 3.45  | -0.94 |
| 13  | <i>Bifidobacterium longum</i> subsp. <i>longum</i> CUETM 290              | 5.13  | -2.32 | 0.77  |
| 14  | <i>Bifidobacterium longum</i> subsp. <i>longum</i> CUETM 171              | 5.37  | -0.67 | -0.09 |
| 15  | <i>Bifidobacterium longum</i> subsp. <i>longum</i> ATCC 51870             | -0.70 | -2.18 | -1.42 |
| 16  | <i>Bifidobacterium pseudolongum</i> subsp. <i>pseudolongum</i> LMG 11594  | -1.42 | 5.01  | -0.92 |
| 17  | <i>Bifidobacterium pseudolongum</i> subsp. <i>globosum</i> LMG 11614      | -2.60 | 4.34  | -0.22 |
| 18  | <i>Bifidobacterium bifidum</i> DSM 20082                                  | -3.13 | -2.58 | 0.19  |
| 19  | <i>Bifidobacterium bifidum</i> LMG 11583                                  | -3.13 | -2.58 | 0.19  |
| 20  | <i>Bifidobacterium bifidum</i> LMG 11582                                  | -3.13 | -2.58 | 0.19  |
| 21  | <i>Bifidobacterium bifidum</i> LMG 13195                                  | -3.13 | -2.58 | 0.19  |
| 22  | <i>Bifidobacterium animalis</i> subsp. <i>lactis</i> DN-173 010           | -1.89 | 4.86  | -0.55 |
| 23  | <i>Bifidobacterium animalis</i> subsp. <i>lactis</i> R-17143              | -0.96 | 5.14  | -1.03 |
| 24  | <i>Bifidobacterium animalis</i> subsp. <i>lactis</i> BB-12                | 0.07  | 5.11  | -1.81 |
| 25  | <i>Bifidobacterium dentium</i> LMG 10507                                  | -0.65 | -1.74 | -1.73 |
| 26  | <i>Bifidobacterium breve</i> LMG 13194                                    | -2.88 | -2.21 | 0.21  |
| 27  | <i>Bifidobacterium breve</i> LMG 13208                                    | -3.13 | -2.58 | 0.19  |
| 28  | <i>Bifidobacterium breve</i> LMG 11040                                    | -3.13 | -2.58 | 0.19  |
| 29  | <i>Bifidobacterium breve</i> Yakult                                       | -3.13 | -2.58 | 0.19  |
| 30  | <i>Bifidobacterium thermophilum</i> LMG 11574                             | -3.08 | -2.14 | -0.12 |
| 31  | <i>Bifidobacterium catenulatum</i> LMG 11043 <sup>T</sup>                 | -0.14 | 2.16  | 12.94 |

|    |                                                            |       |       |       |
|----|------------------------------------------------------------|-------|-------|-------|
| 32 | <i>Bifidobacterium gallicum</i> LMG 11596 <sup>T</sup>     | -2.19 | 3.84  | -0.32 |
| 33 | <i>Bifidobacterium angulatum</i> LMG 11039 <sup>T</sup>    | -0.60 | 2.89  | -0.42 |
| 34 | <i>Bifidobacterium angulatum</i> LMG 11568                 | -1.74 | -2.18 | -0.87 |
| 35 | <i>Bifidobacterium adolescentis</i> LMG 10734              | -3.25 | 0.42  | -0.09 |
| 36 | <i>Bifidobacterium adolescentis</i> LMG 10502 <sup>T</sup> | -1.65 | 1.59  | 0.54  |

---

**Figure S1.** Carbohydrate degradation by bifidobacterial strains belonging to cluster I.

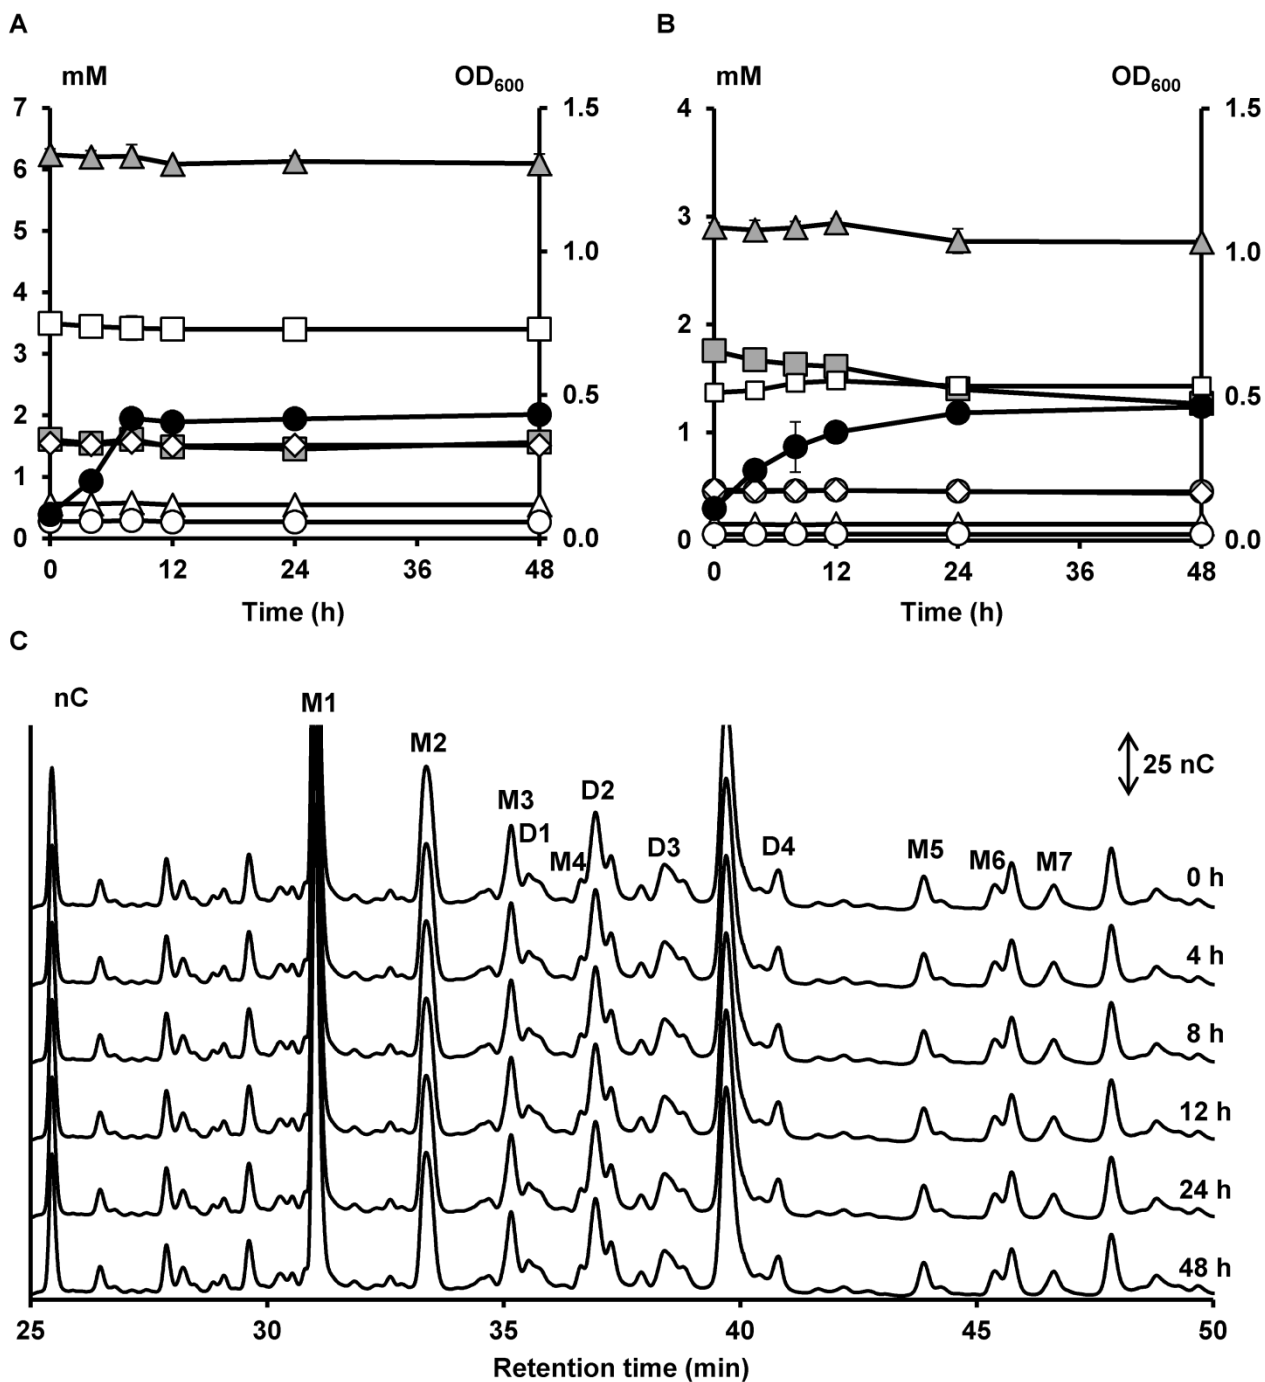

**Figure S1.A.** Growth of and carbohydrate degradation by *Bifidobacterium longum* subsp. *infantis* LMG 11570 in a medium for colon bacteria with 5 g L<sup>-1</sup> of XOS (A) or 5 g L<sup>-1</sup> of (A)XOS (B and C) as a function of time (samples taken at 0, 4, 8, 12, 24, and 48 h). Growth is represented as OD<sub>600</sub> measurements (●). Monosaccharide, XOS, and XOS<sub>(A)XOS</sub> consumption are represented as

residual concentrations of arabinose (●), xylose (■), xylobiose (▲), xylotriose (□), xylohexaose (◇), xylopentaose (Δ), and xylohexaose (○) in mM. (C) represents an enlargement of the AXOS HPAEC-PAD chromatograms between 25.0 and 50.0 min of elution. D1-D4, AXOS peaks containing at least one doubly substituted Xylp residue. M1-M7, AXOS peaks containing at least one monosubstituted Xylp residue.

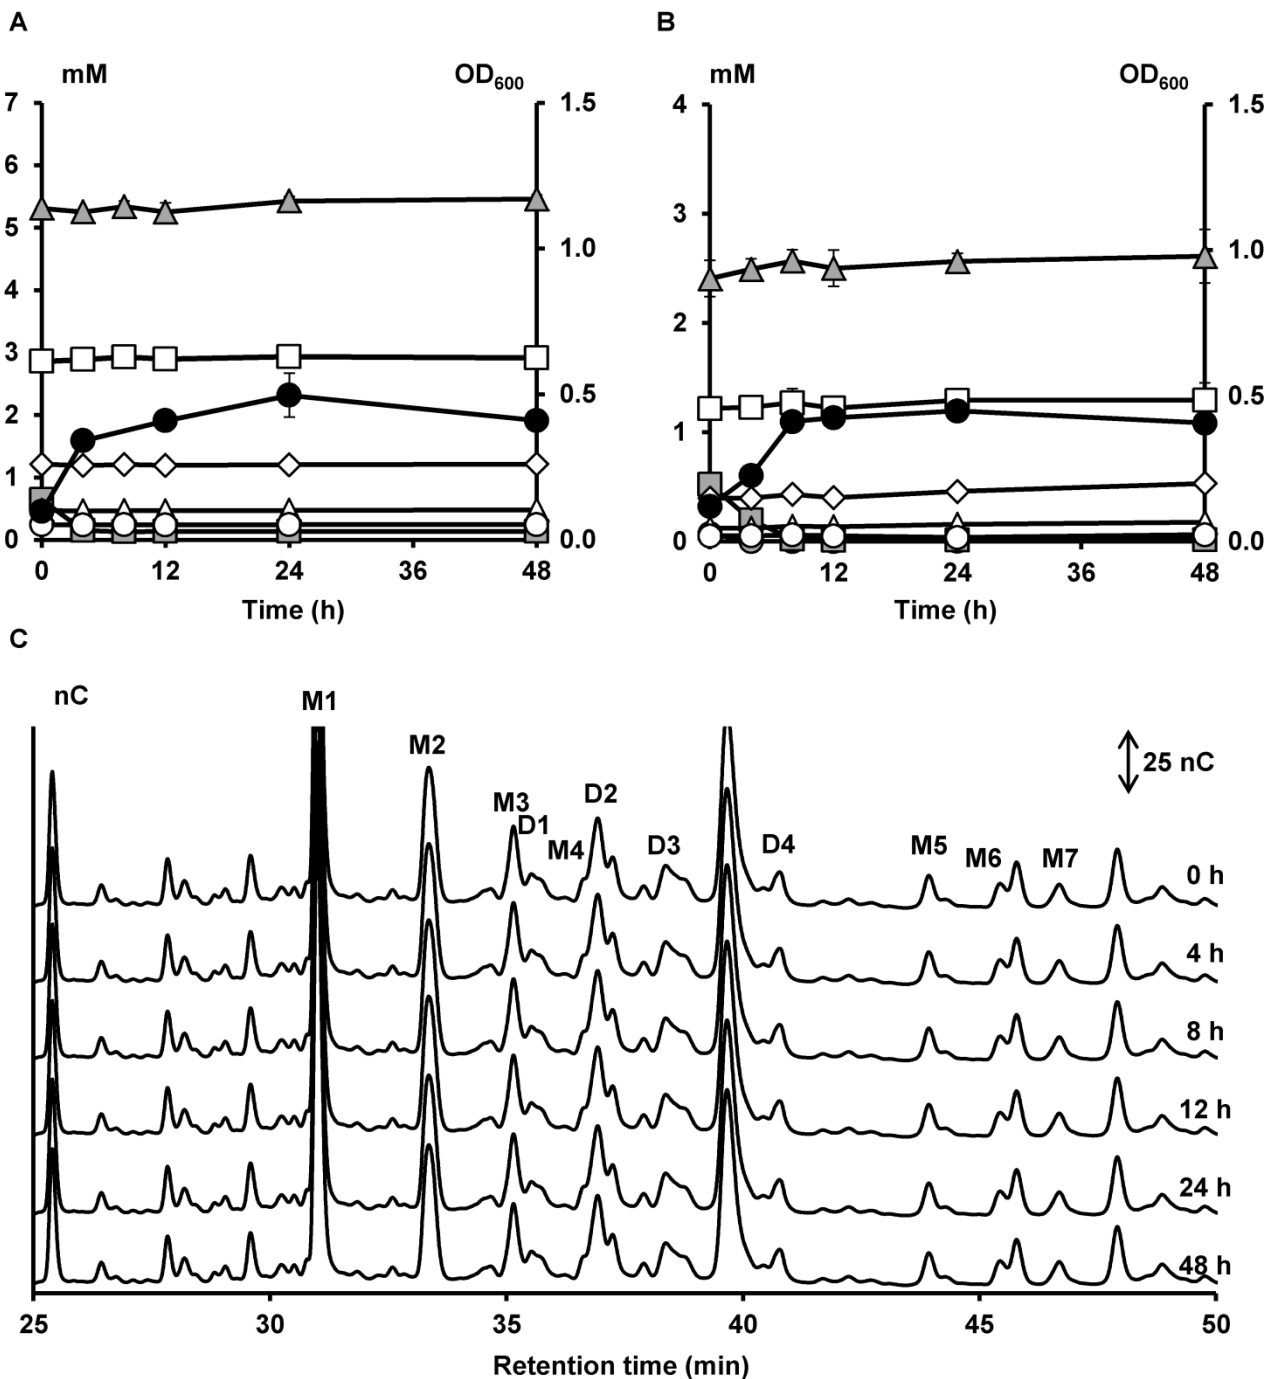

**Figure S1.B.** Growth of and carbohydrate degradation by *Bifidobacterium longum* subsp. *longum* LMG 13196 in a medium for colon bacteria with 5 g L<sup>-1</sup> of XOS (A) or 5 g L<sup>-1</sup> of (A)XOS (B and C) as a function of time (samples taken at 0, 4, 8, 12, 24, and 48 h). Peaks and symbols are named as in Figure S1.A.

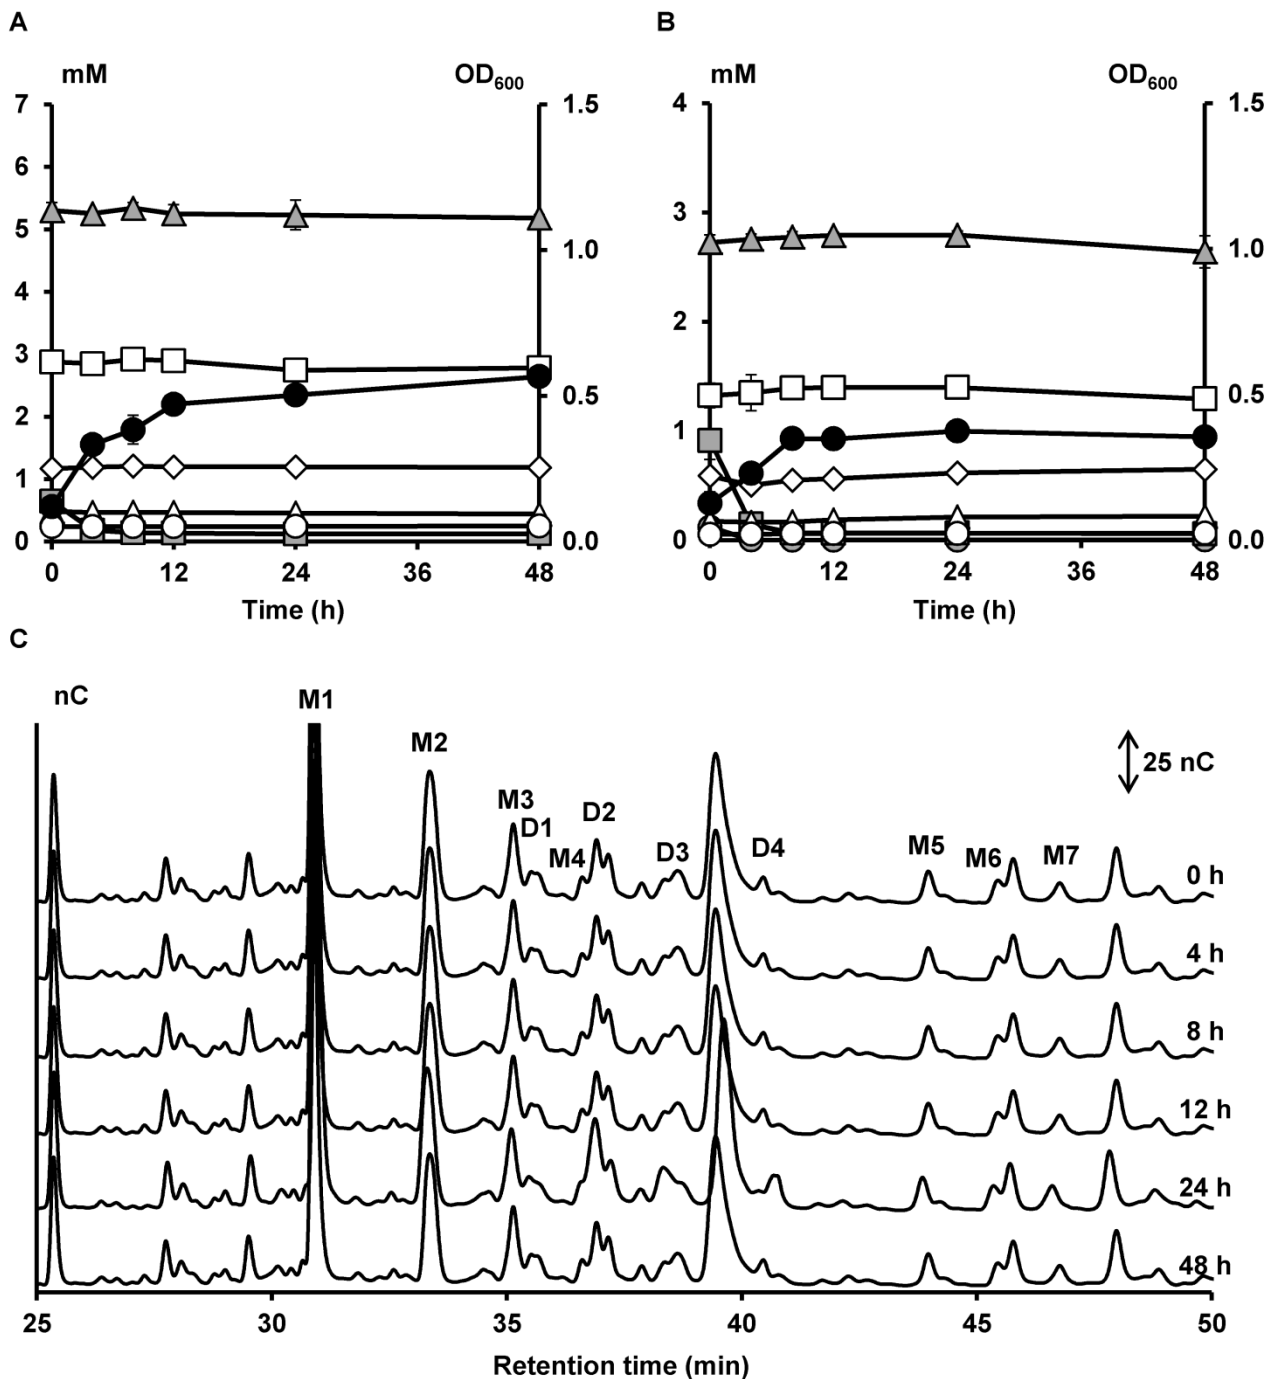

**Figure S1.C.** Growth of and carbohydrate degradation by *Bifidobacterium longum* subsp. *longum* ATCC 51870 in a medium for colon bacteria with 5 g L<sup>-1</sup> of XOS (A) or 5 g L<sup>-1</sup> of (A)XOS (B and C) as a function of time (samples taken at 0, 4, 8, 12, 24, and 48 h). Peaks and symbols are named as in Figure S1.A.



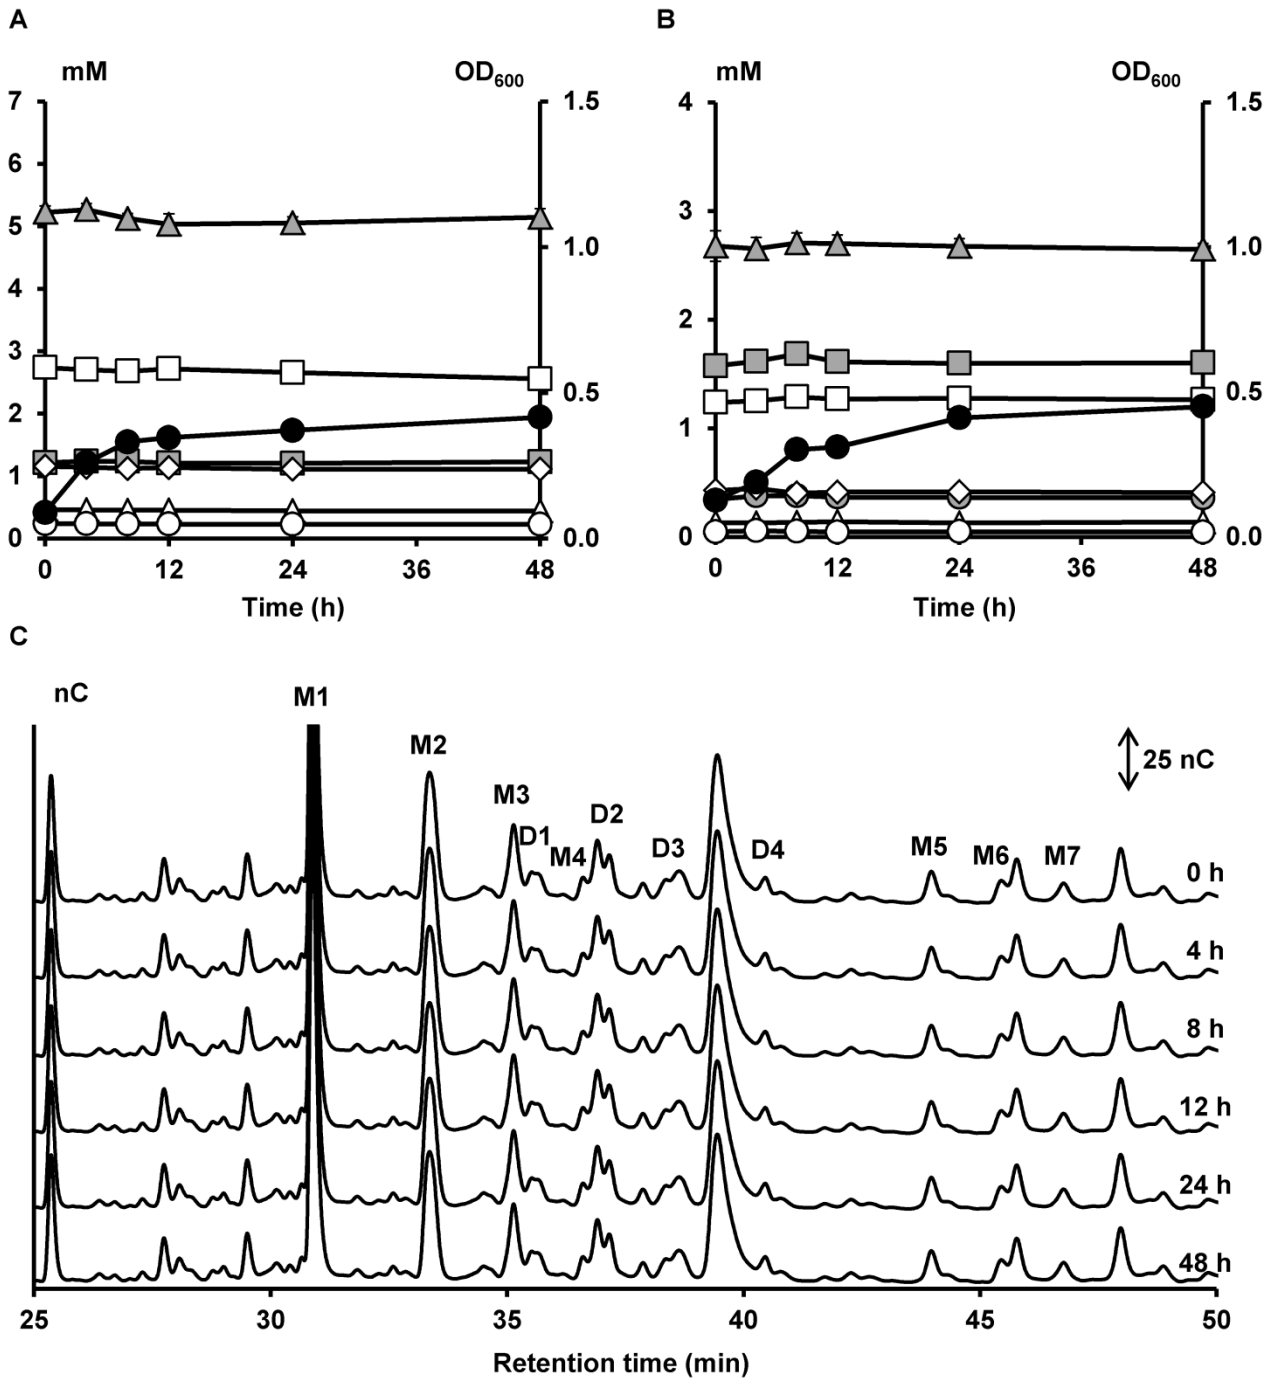

**Figure S1.D.** Growth of and carbohydrate degradation by *Bifidobacterium bifidum* DSM 20082 in a medium for colon bacteria with 5 g L<sup>-1</sup> of XOS (A) or 5 g L<sup>-1</sup> of (A)XOS (B and C) as a function of time (samples taken at 0, 4, 8, 12, 24, and 48 h). Peaks and symbols are named as in Figure S1.A.

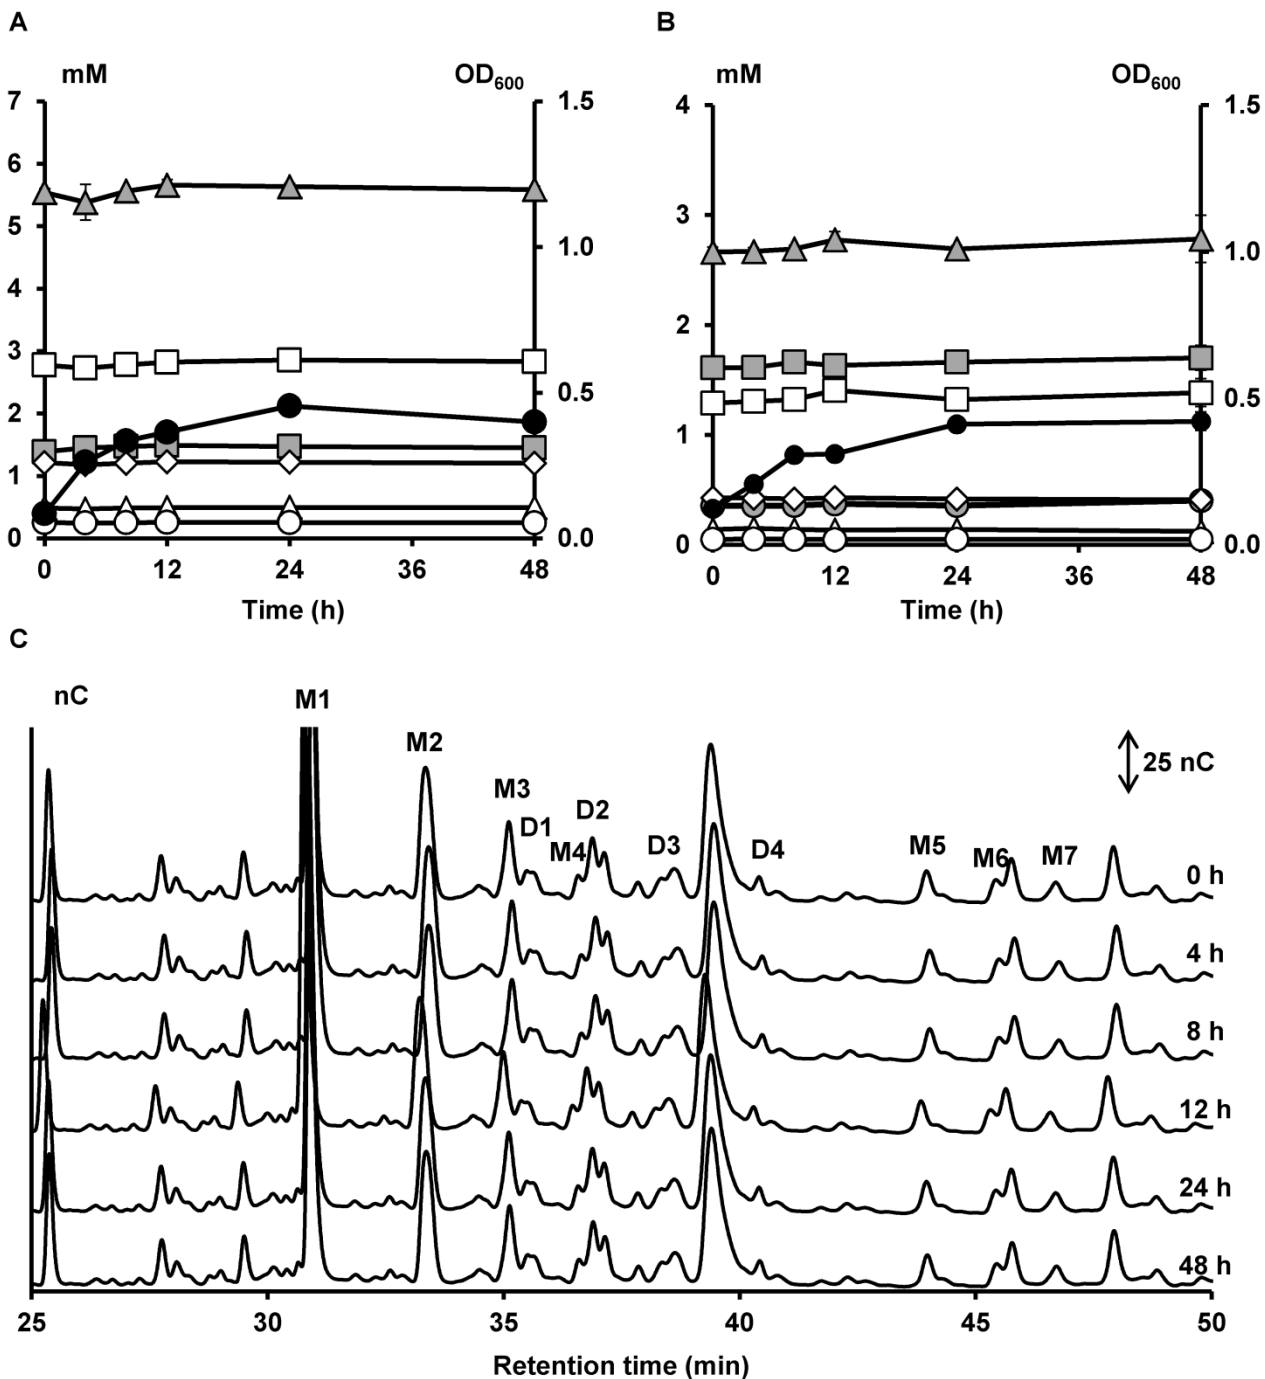

**Figure S1.E.** Growth of and carbohydrate degradation by *Bifidobacterium bifidum* LMG 11582 in a medium for colon bacteria with 5 g L<sup>-1</sup> of XOS (A) or 5 g L<sup>-1</sup> of (A)XOS (B and C) as a function of time (samples taken at 0, 4, 8, 12, 24, and 48 h). Peaks and symbols are named as in Figure S1.A.

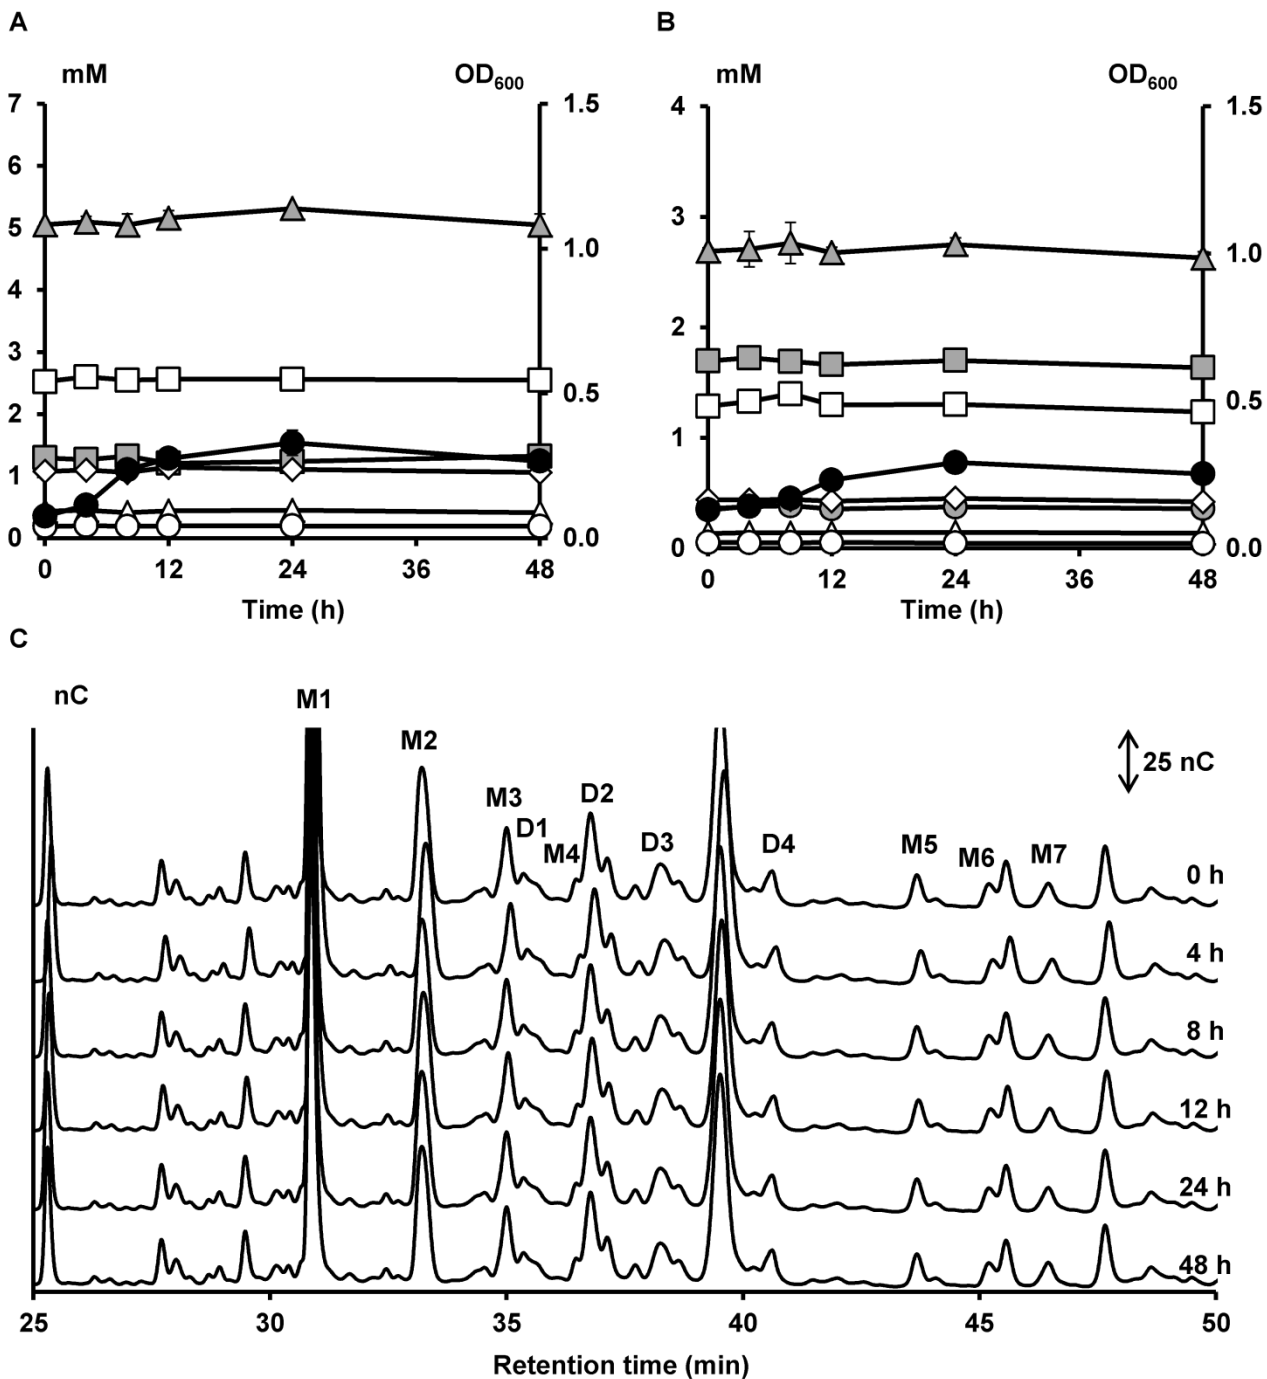

**Figure S1.F.** Growth of and carbohydrate degradation by *Bifidobacterium bifidum* LMG 13195 in a medium for colon bacteria with 5 g L<sup>-1</sup> of XOS (A) or 5 g L<sup>-1</sup> of (A)XOS (B and C) as a function of time (samples taken at 0, 4, 8, 12, 24, and 48 h). Peaks and symbols are named as in Figure S1.A.

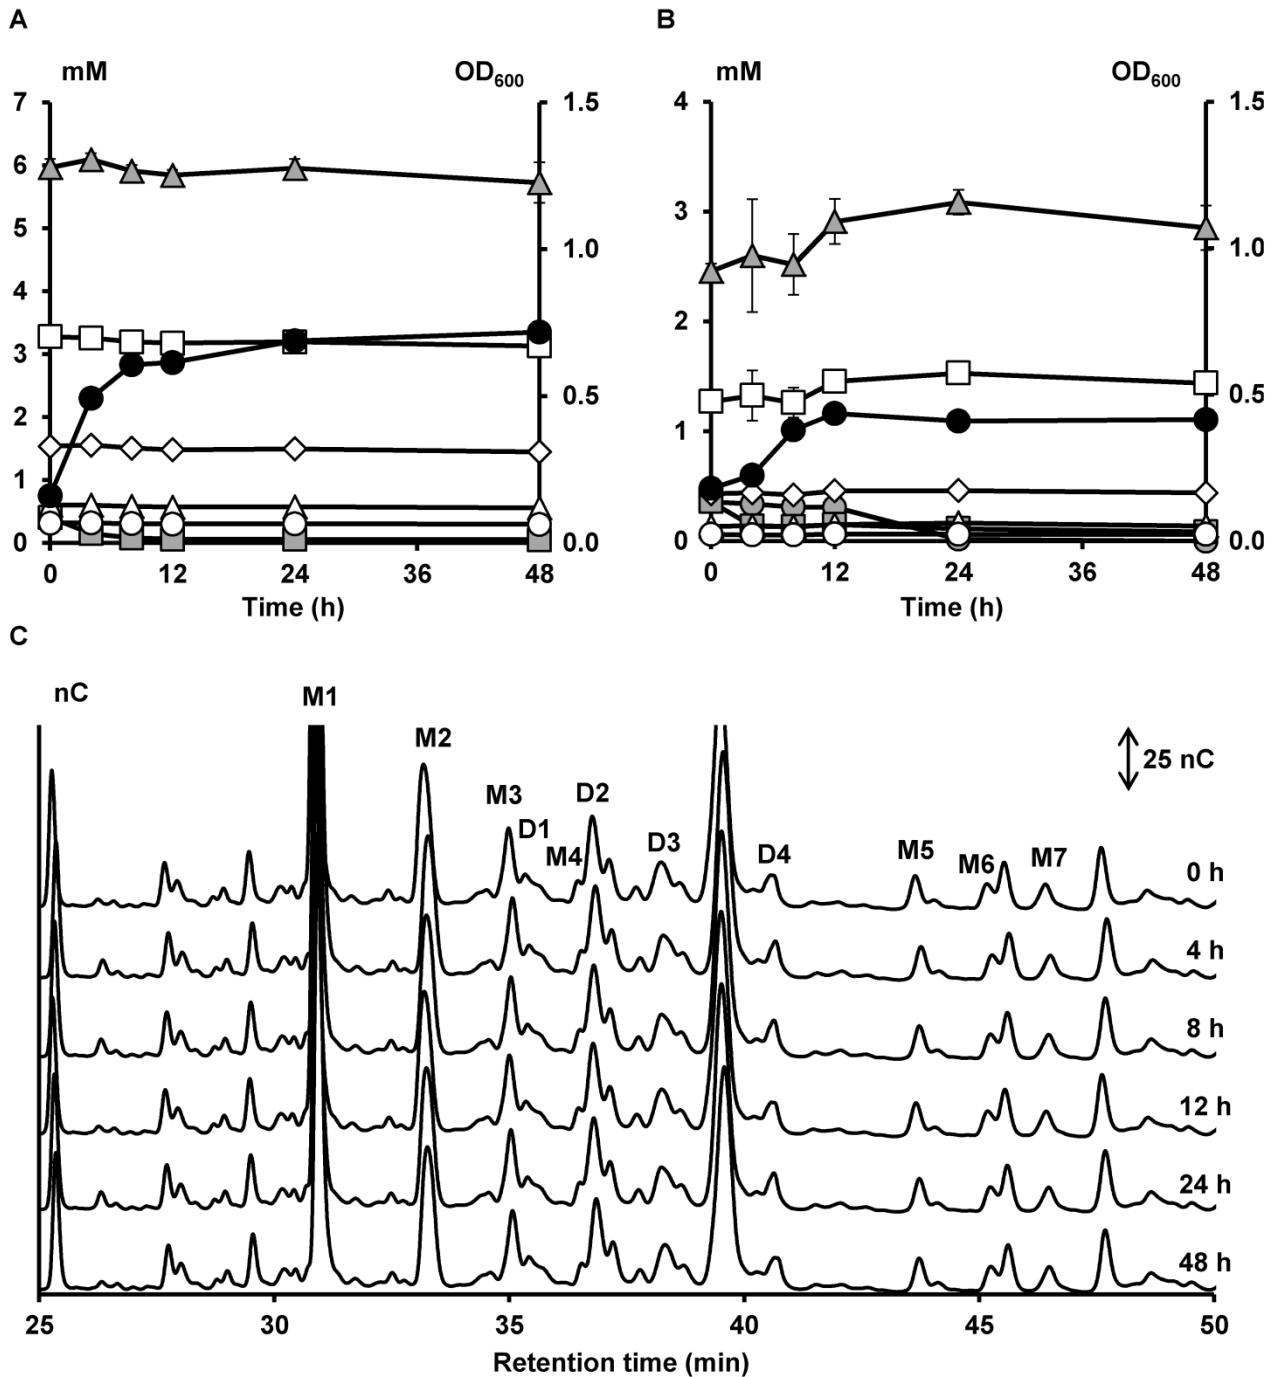

**Figure S1.G.** Growth of and carbohydrate degradation by *Bifidobacterium dentium* LMG 10507 in a medium for colon bacteria with 5 g L<sup>-1</sup> of XOS (A) or 5 g L<sup>-1</sup> of (A)XOS (B and C) as a function of time (samples taken at 0, 4, 8, 12, 24, and 48 h). Peaks and symbols are named as in Figure S1.A.

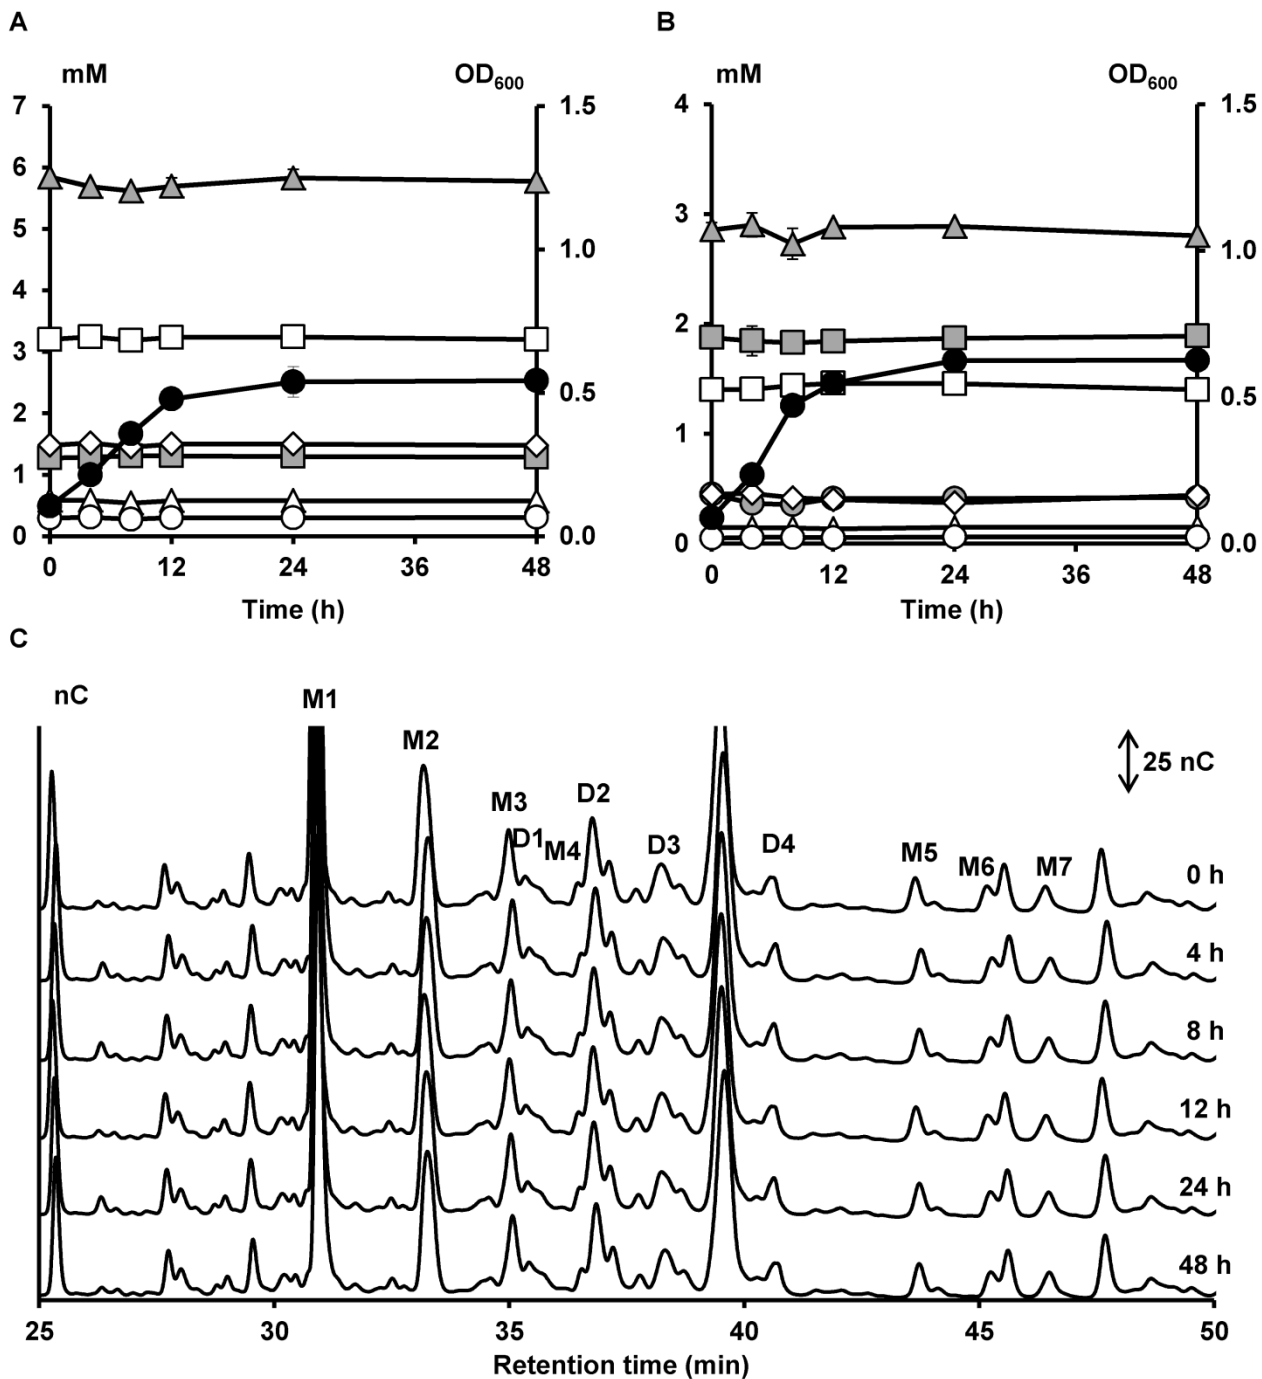

**Figure S1.H.** Growth of and carbohydrate degradation by *Bifidobacterium breve* LMG 13194 in a medium for colon bacteria with 5 g L<sup>-1</sup> of XOS (A) or 5 g L<sup>-1</sup> of (A)XOS (B and C) as a function of time (samples taken at 0, 4, 8, 12, 24, and 48 h). Peaks and symbols are named as in Figure S1.A.

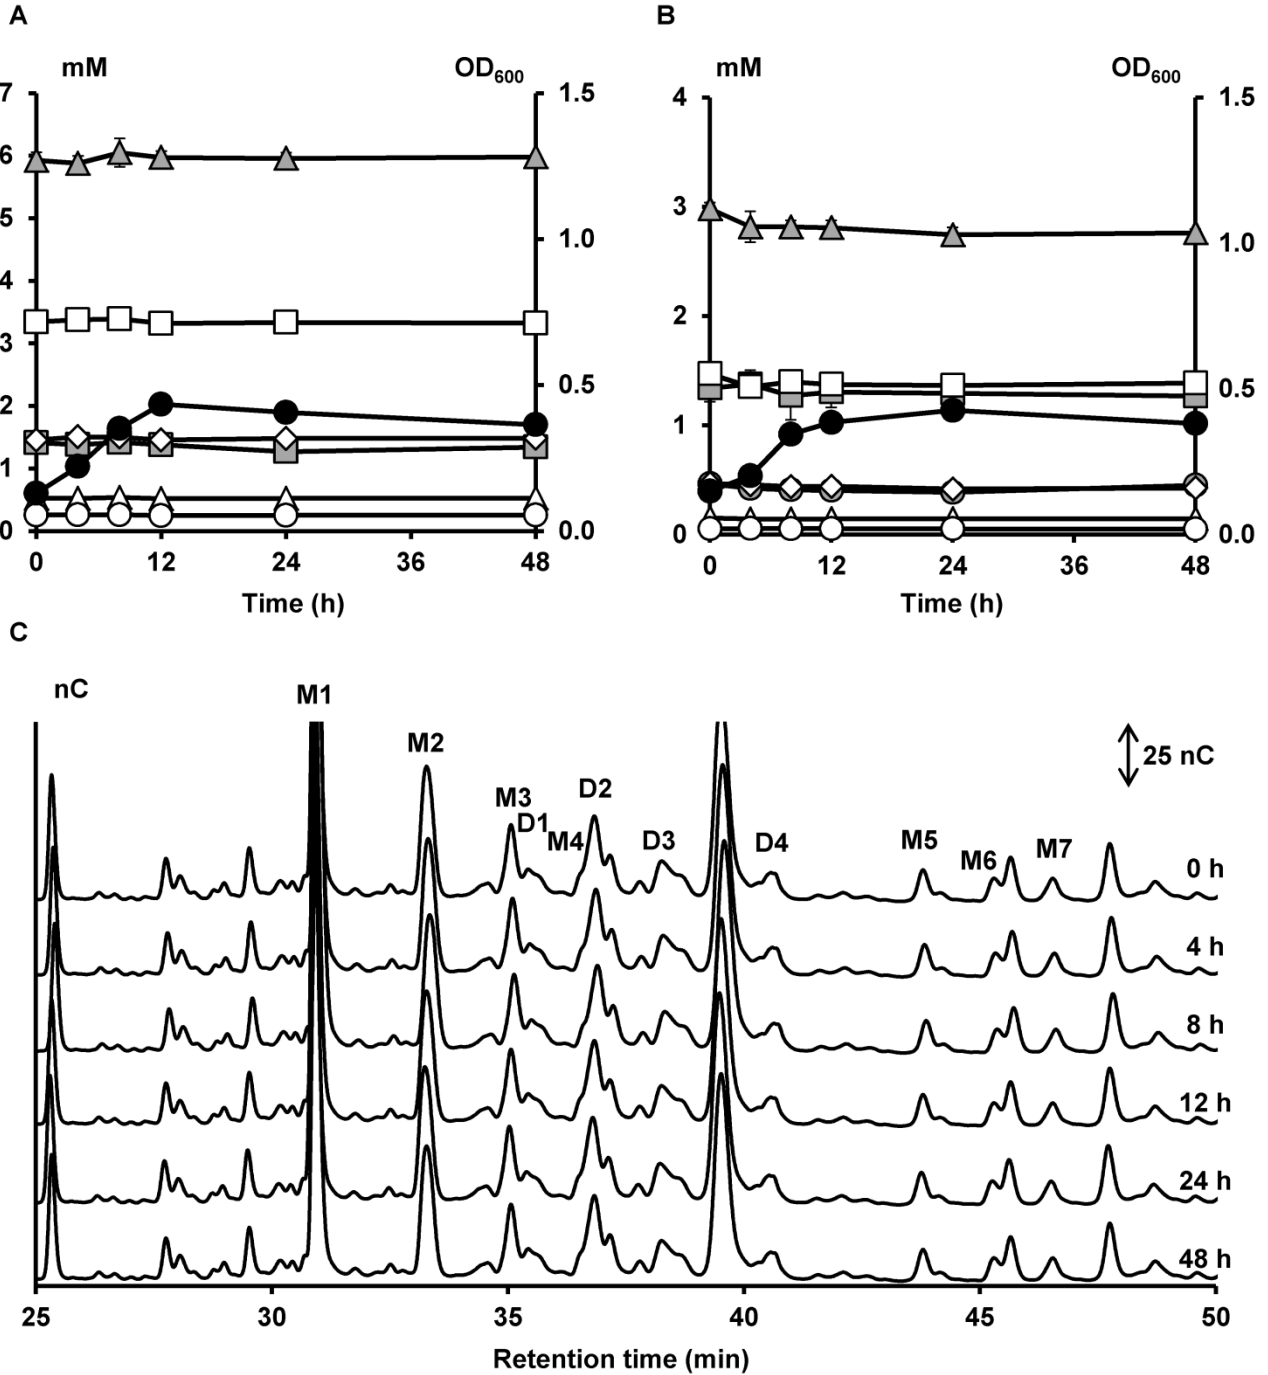

**Figure S1.I.** Growth of and carbohydrate degradation by *Bifidobacterium breve* LMG 13208 in a medium for colon bacteria with 5 g L<sup>-1</sup> of XOS (A) or 5 g L<sup>-1</sup> of (A)XOS (B and C) as a function of time (samples taken at 0, 4, 8, 12, 24, and 48 h). Peaks and symbols are named as in Figure S1.A.

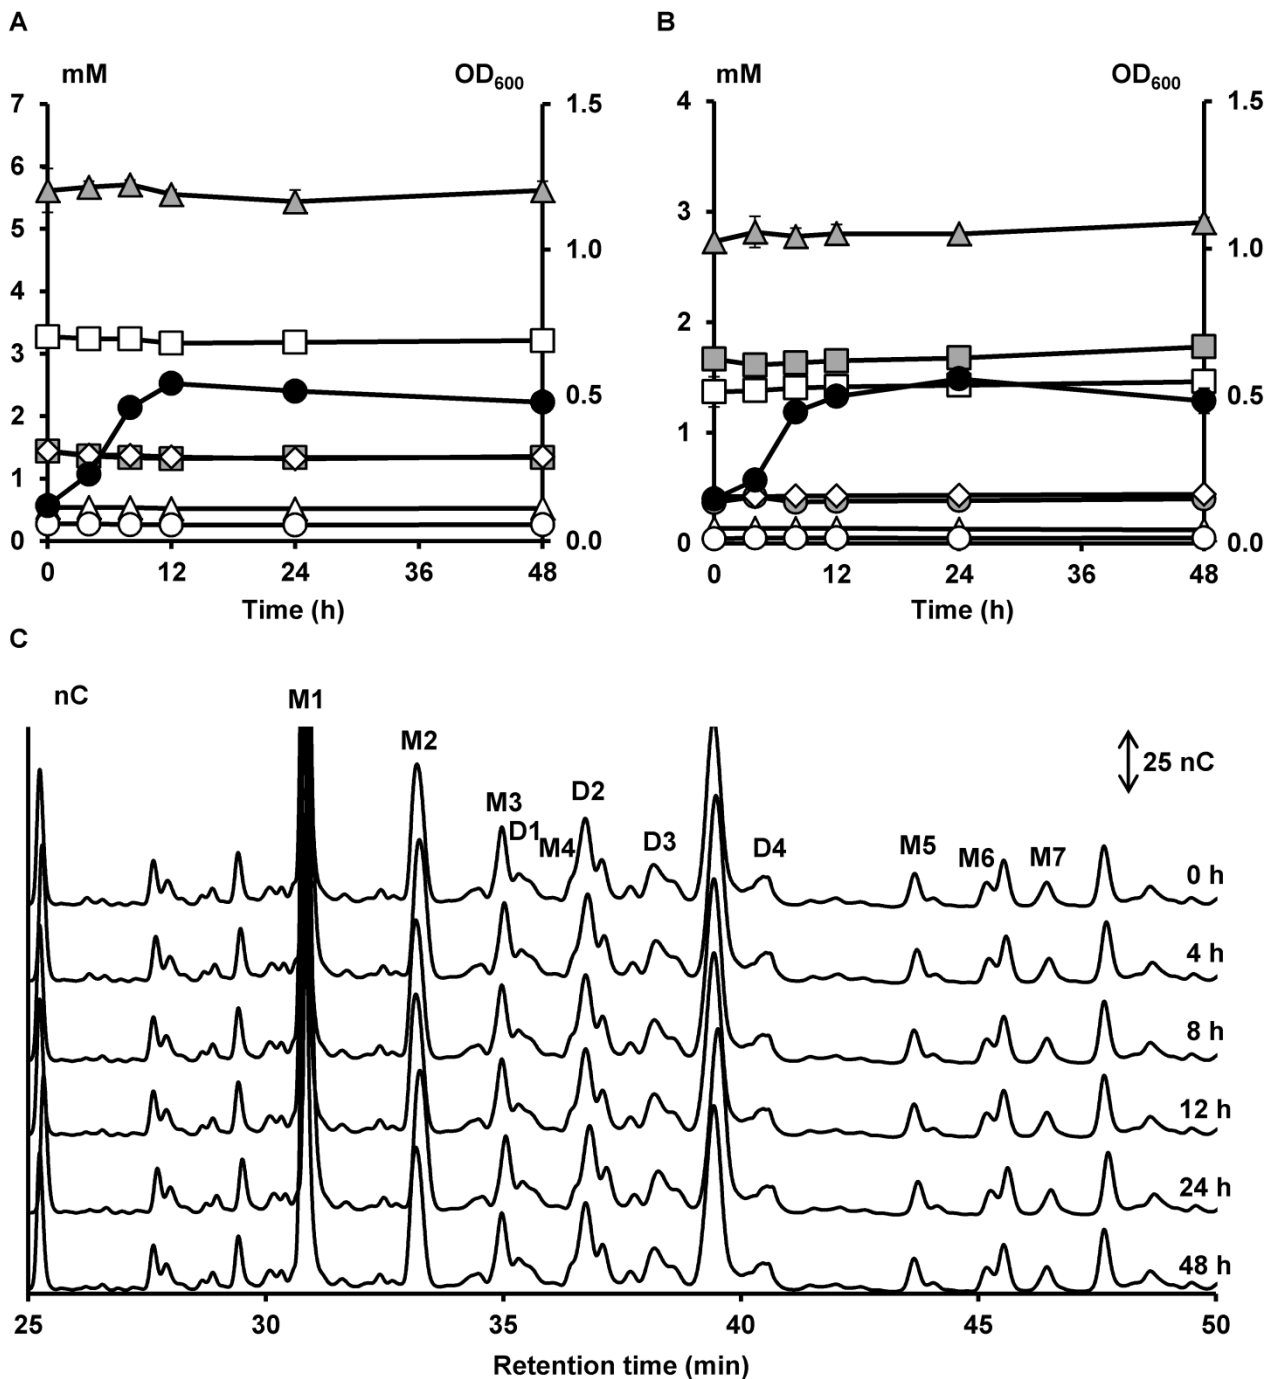

**Figure S1.J.** Growth of and carbohydrate degradation by *Bifidobacterium breve* LMG 11040 in a medium for colon bacteria with 5 g L<sup>-1</sup> of XOS (A) or 5 g L<sup>-1</sup> of (A)XOS (B and C) as a function of time (samples taken at 0, 4, 8, 12, 24, and 48 h). Peaks and symbols are named as in Figure S1.A.

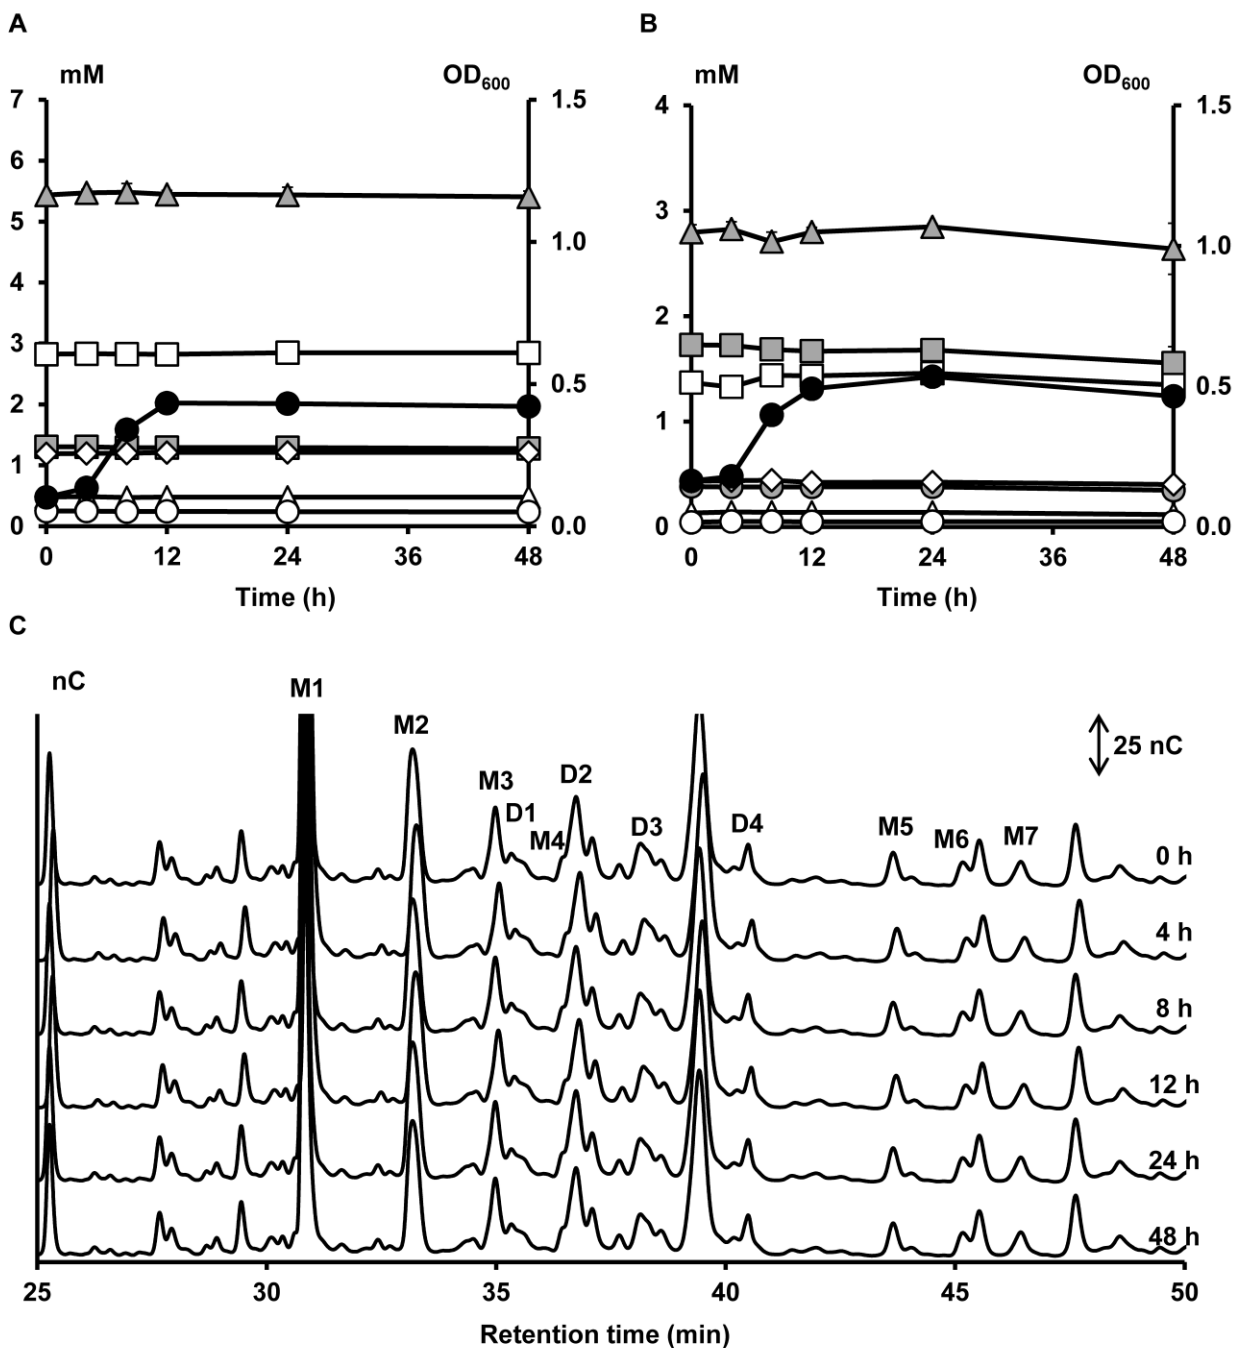

**Figure S1.K.** Growth of and carbohydrate degradation by *Bifidobacterium breve* Yakult in a medium for colon bacteria with 5 g L<sup>-1</sup> of XOS (A) or 5 g L<sup>-1</sup> of (A)XOS (B and C) as a function of time (samples taken at 0, 4, 8, 12, 24, and 48 h). Peaks and symbols are named as in Figure S1.A.



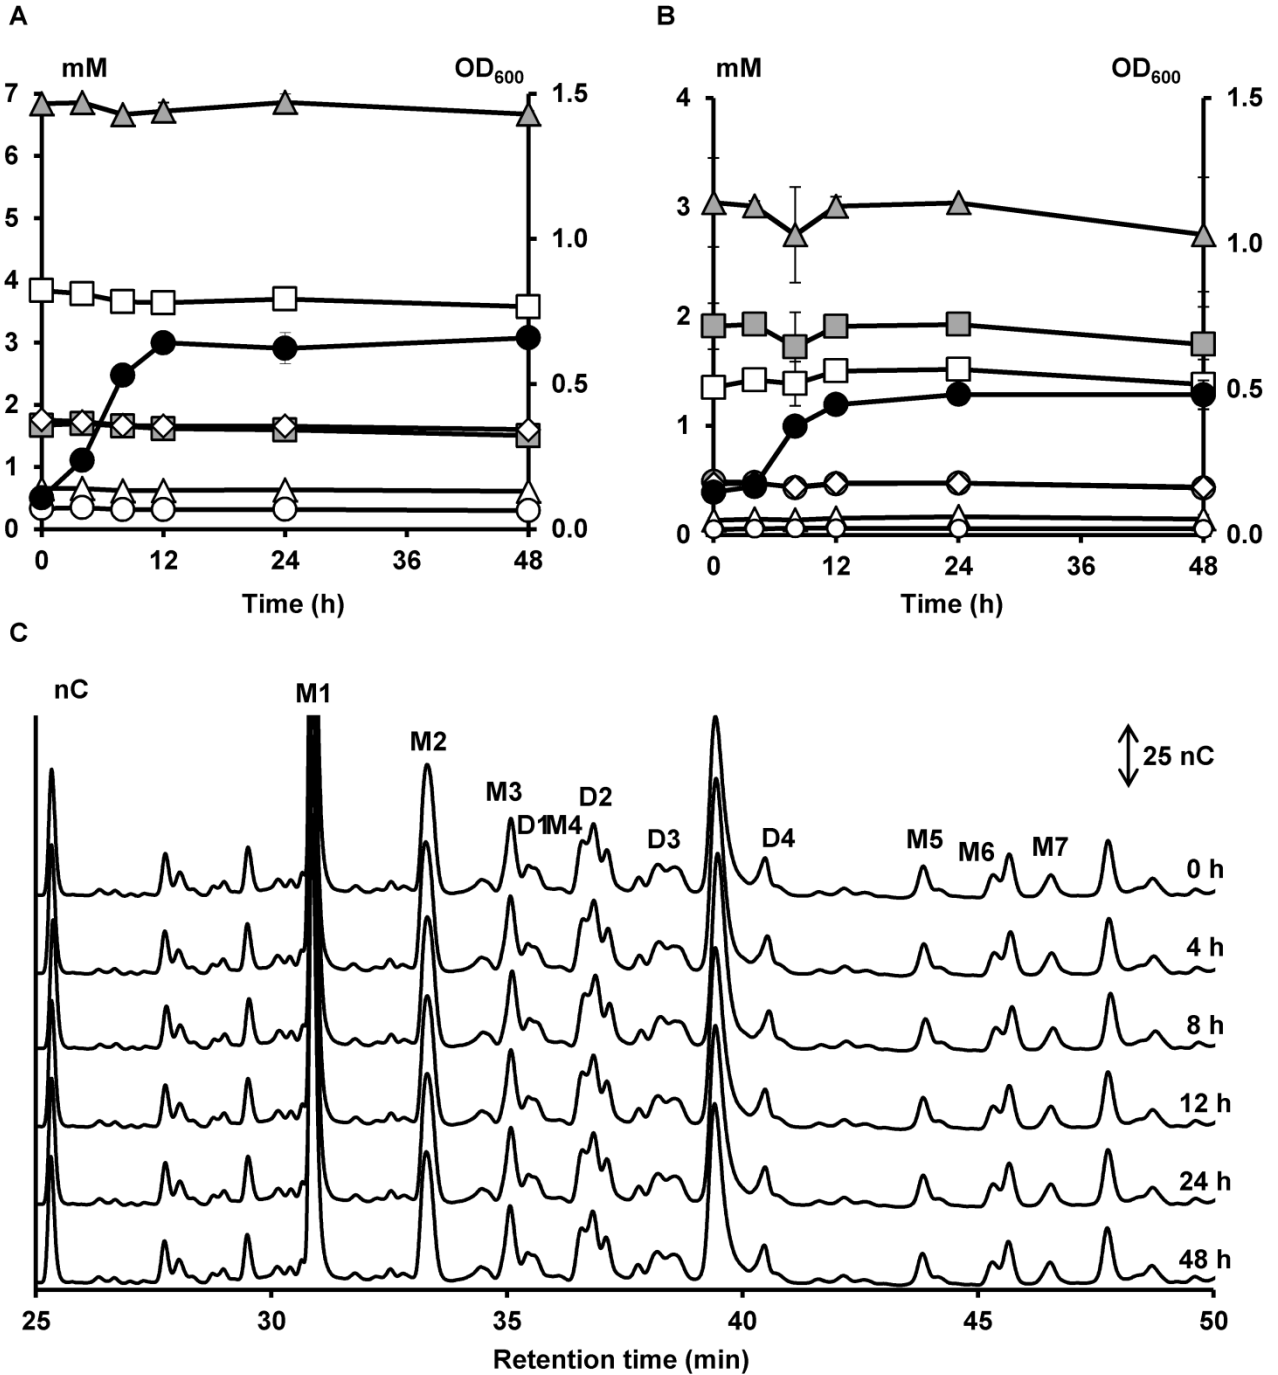

**Figure S1.L.** Growth of and carbohydrate degradation by *Bifidobacterium thermophilum* LMG 11574 in a medium for colon bacteria with 5 g L<sup>-1</sup> of XOS (A) or 5 g L<sup>-1</sup> of (A)XOS (B and C) as a function of time (samples taken at 0, 4, 8, 12, 24, and 48 h). Peaks and symbols are named as in Figure S1.A.

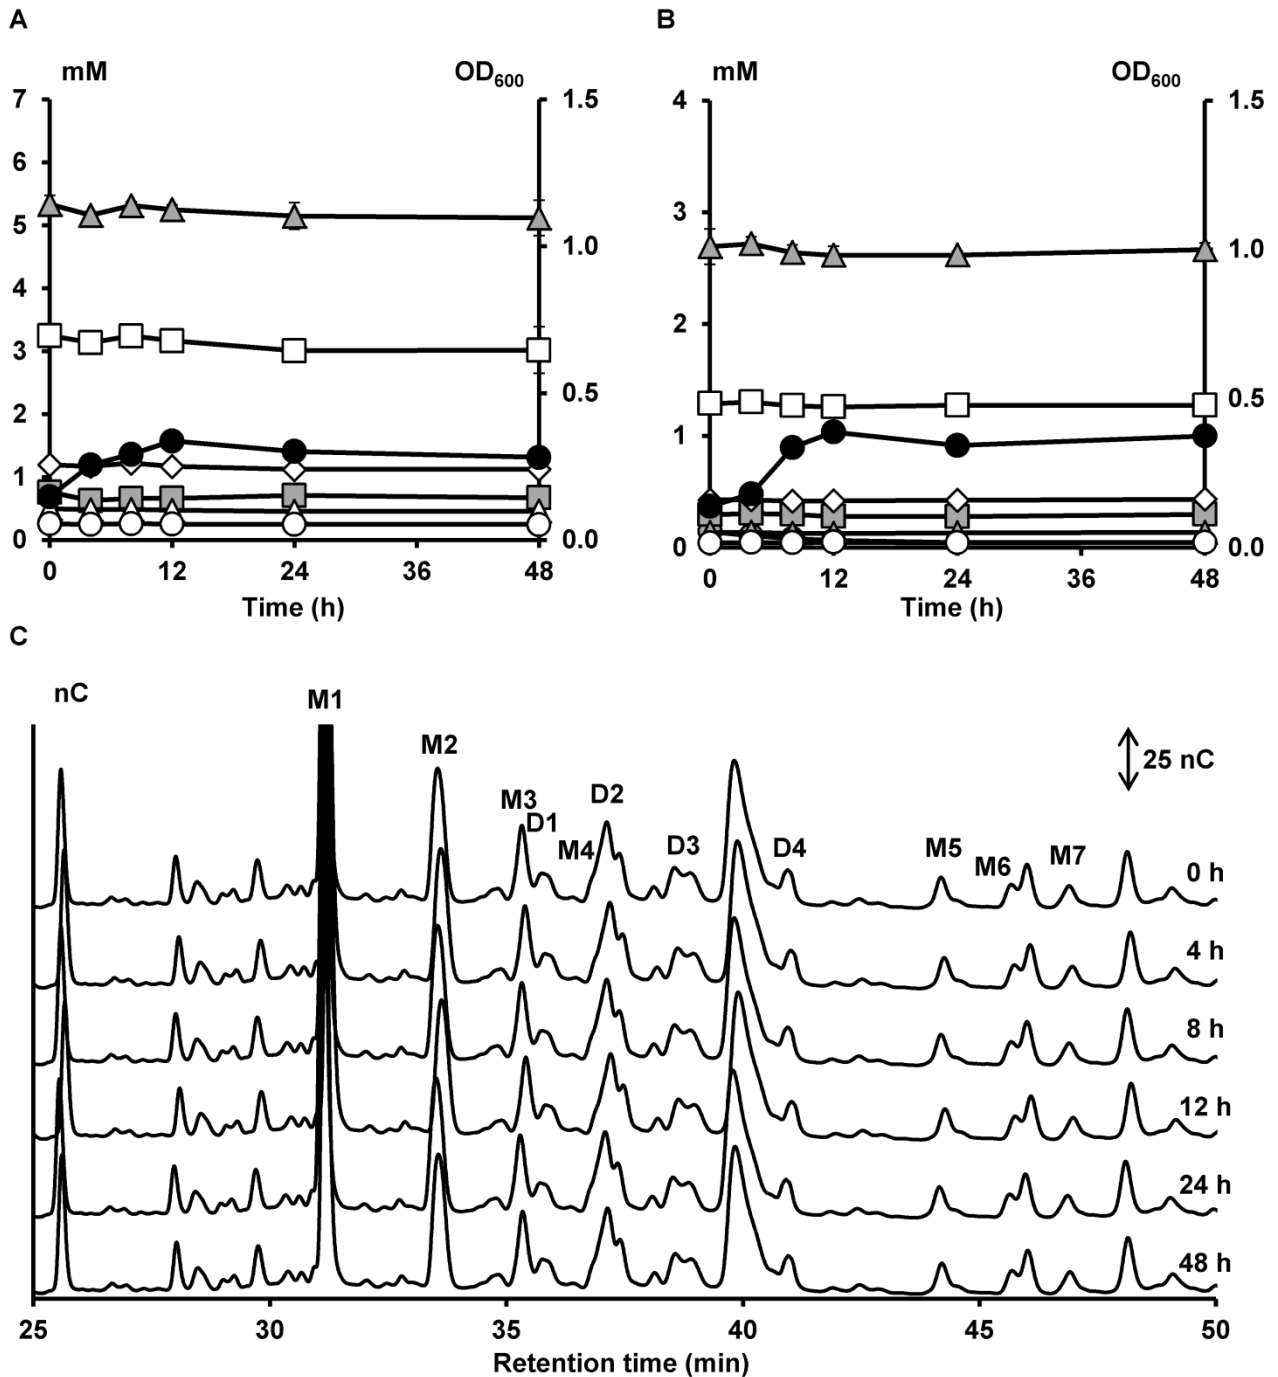

**Figure S1.M.** Growth of and carbohydrate degradation by *Bifidobacterium angulatum* LMG 11568 in a medium for colon bacteria with 5 g L<sup>-1</sup> of XOS (A) or 5 g L<sup>-1</sup> of (A)XOS (B and C) as a function of time (samples taken at 0, 4, 8, 12, 24, and 48 h). Peaks and symbols are named as in Figure S1.A.

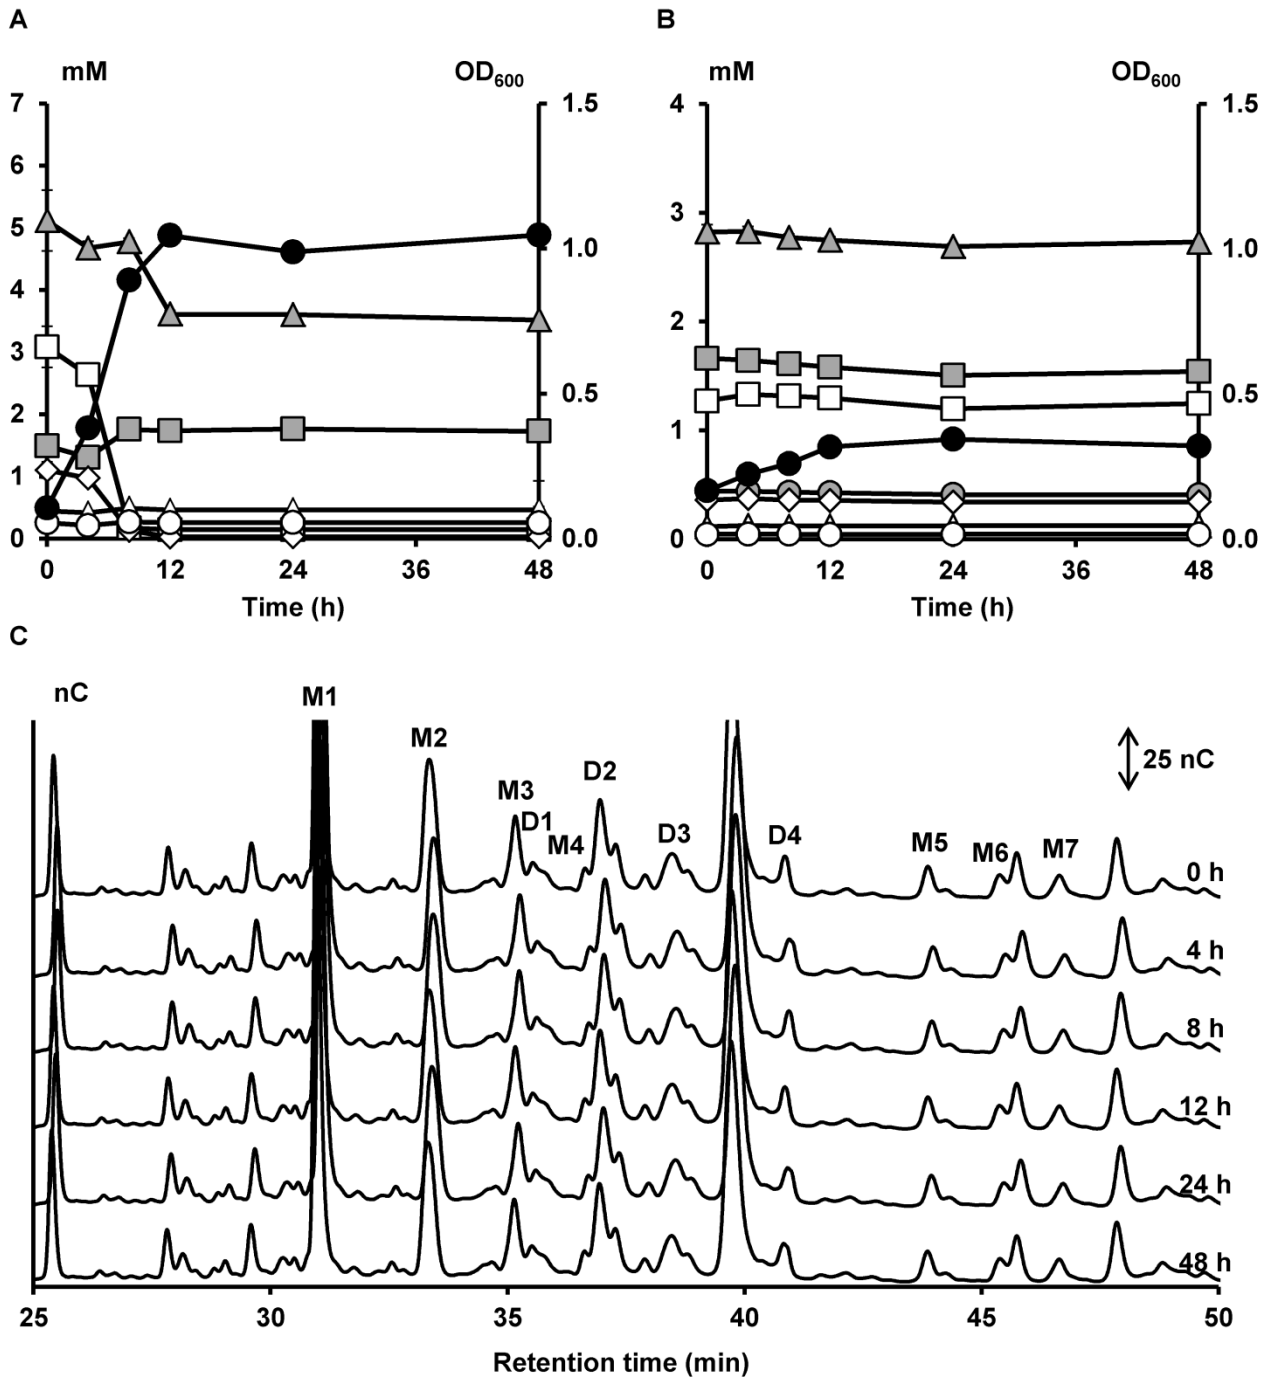

**Figure S1.N.** Growth of and carbohydrate degradation by *Bifidobacterium adolescentis* LMG 10734 in a medium for colon bacteria with 5 g L<sup>-1</sup> of XOS (A) or 5 g L<sup>-1</sup> of (A)XOS (B and C) as a function of time (samples taken at 0, 4, 8, 12, 24, and 48 h). Peaks and symbols are named as in Figure S1.A.

**Figure S2.** Carbohydrate degradation by bifidobacterial strains belonging to cluster II.

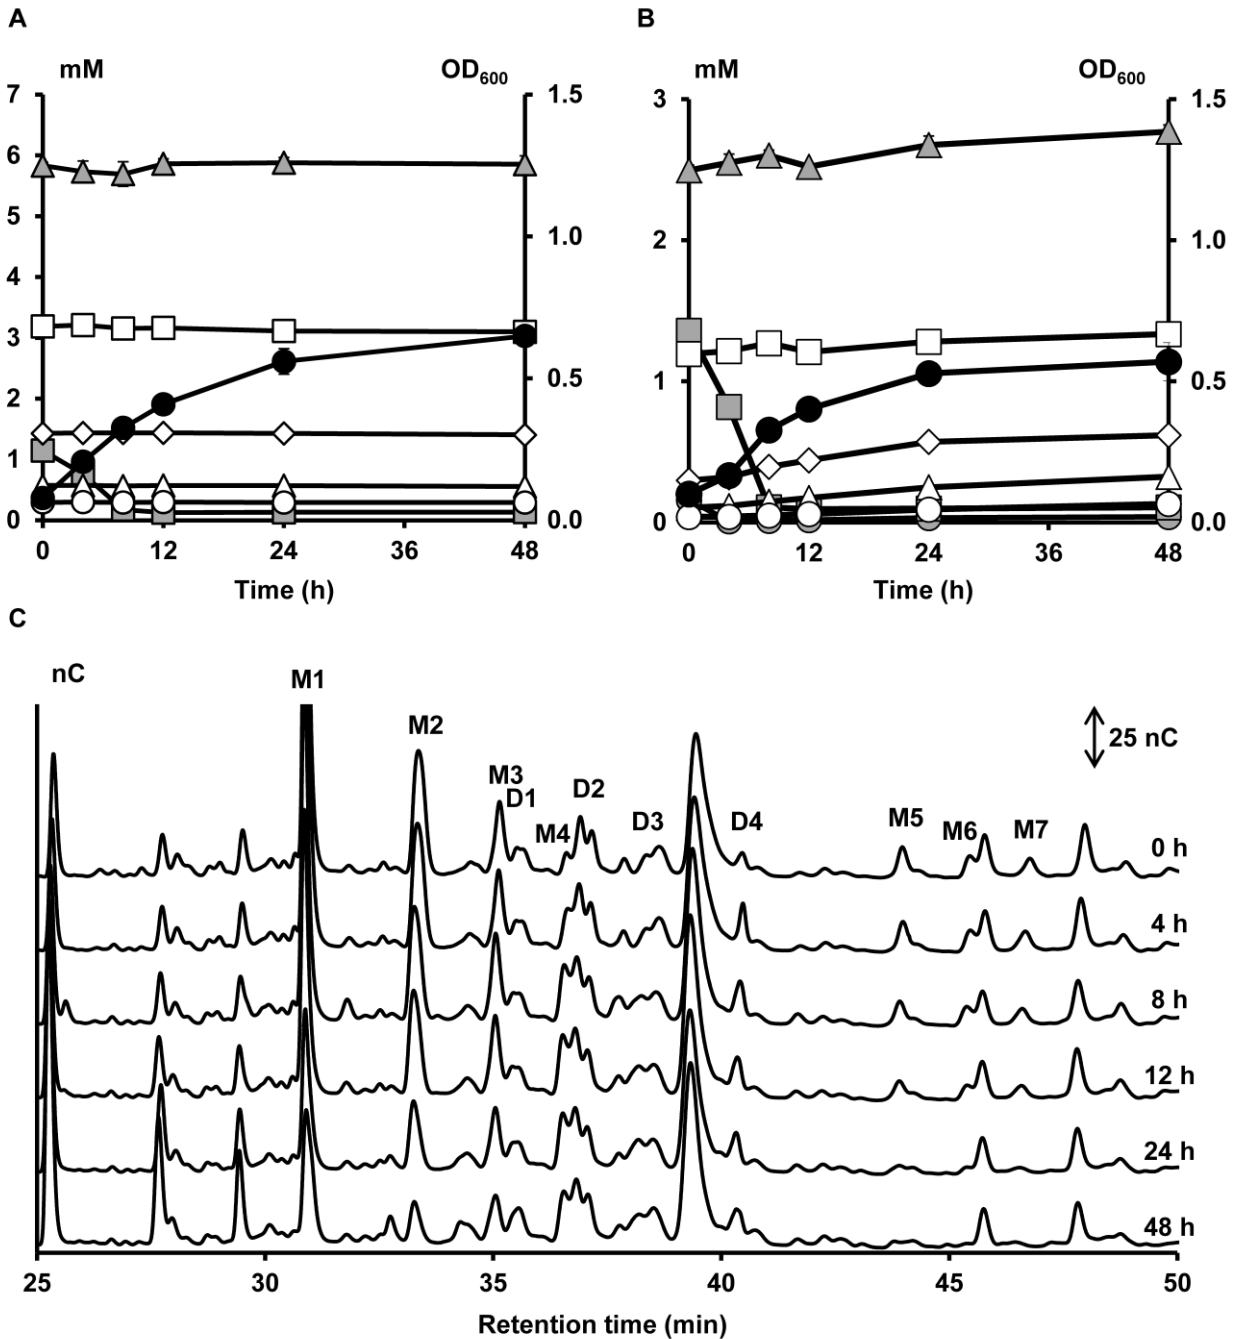

**Figure S2.A.** Growth of and carbohydrate degradation by *Bifidobacterium longum* subsp. *longum* BB536 in a medium for colon bacteria with 5 g L<sup>-1</sup> of XOS (A) or 5 g L<sup>-1</sup> of (A)XOS (B and C) as a function of time (samples taken at 0, 4, 8, 12, 24, and 48 h). Growth is represented as OD<sub>600</sub> measurements (●). Monosaccharide, XOS, and XOS<sub>(A)</sub>XOS consumption are represented as as

residual concentrations of arabinose (●), xylose (■), xylobiose (▲), xylotriose (□), xylohexaose (◇), xylopentaose (Δ), and xylohexaose (○) in mM. (C) represents an enlargement of the AXOS HPAEC-PAD chromatograms between 25.0 and 50.0 min of elution. D1-D4, AXOS peaks containing at least one doubly substituted Xylp residue. M1-M7, AXOS peaks containing at least one monosubstituted Xylp residue.

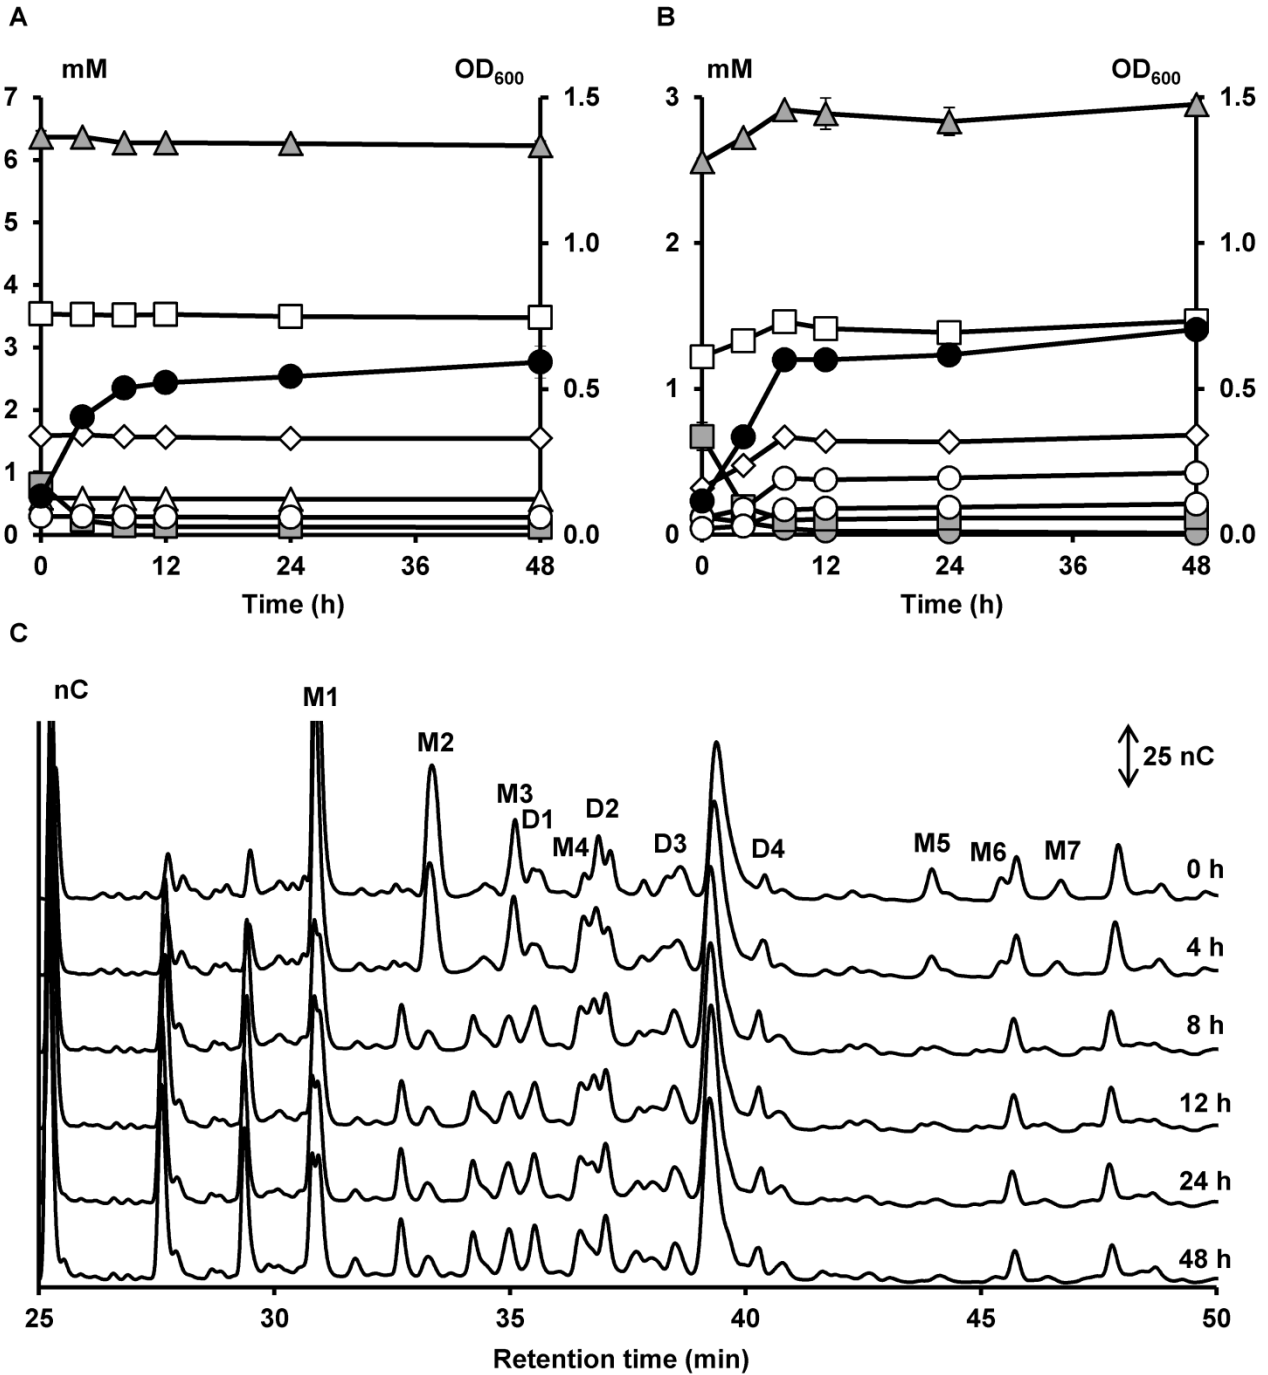

**Figure S2.B.** Growth of and carbohydrate degradation by *Bifidobacterium longum* subsp. *longum* LMG 13197<sup>T</sup> in a medium for colon bacteria with 5 g L<sup>-1</sup> of XOS (A) or 5 g L<sup>-1</sup> of (A)XOS (B and C) as a function of time (samples taken at 0, 4, 8, 12, 24, and 48 h). Peaks and symbols are named as in Figure S2.A.

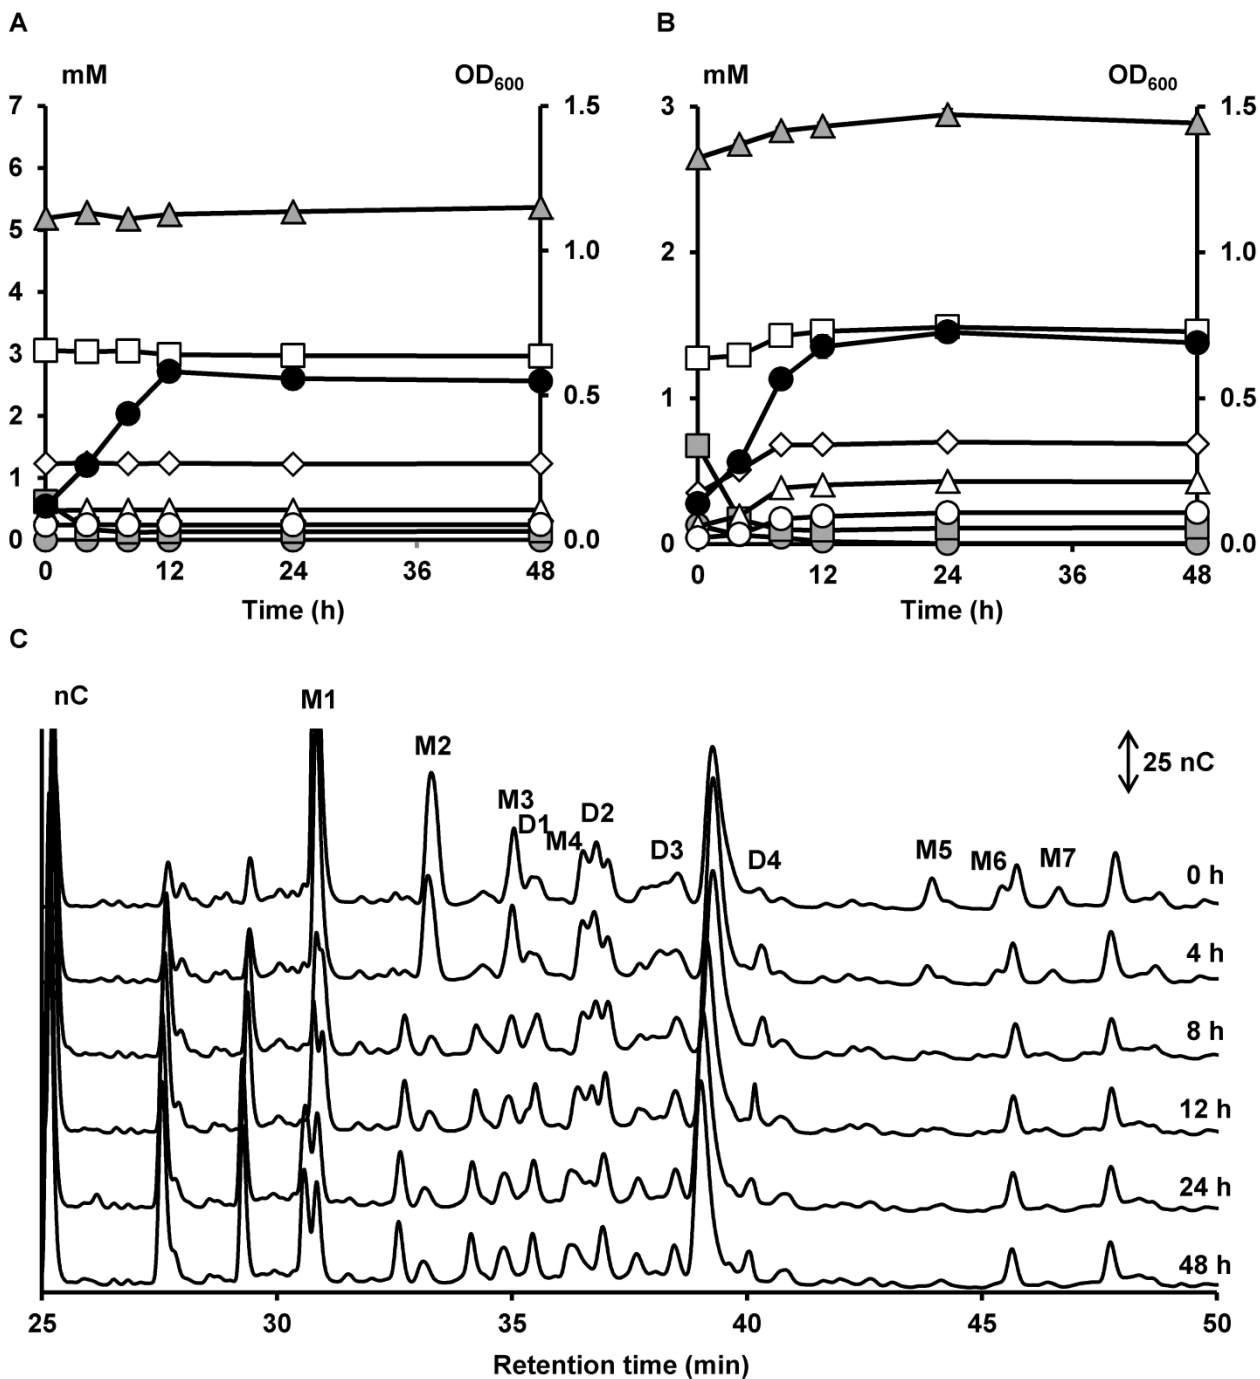

**Figure S2.C.** Growth of and carbohydrate degradation by *Bifidobacterium longum* subsp. *longum* 46 in a medium for colon bacteria with 5 g L<sup>-1</sup> of XOS (A) or 5 g L<sup>-1</sup> of (A)XOS (B and C) as a function of time (samples taken at 0, 4, 8, 12, 24, and 48 h). Peaks and symbols are named as in Figure S2.A.

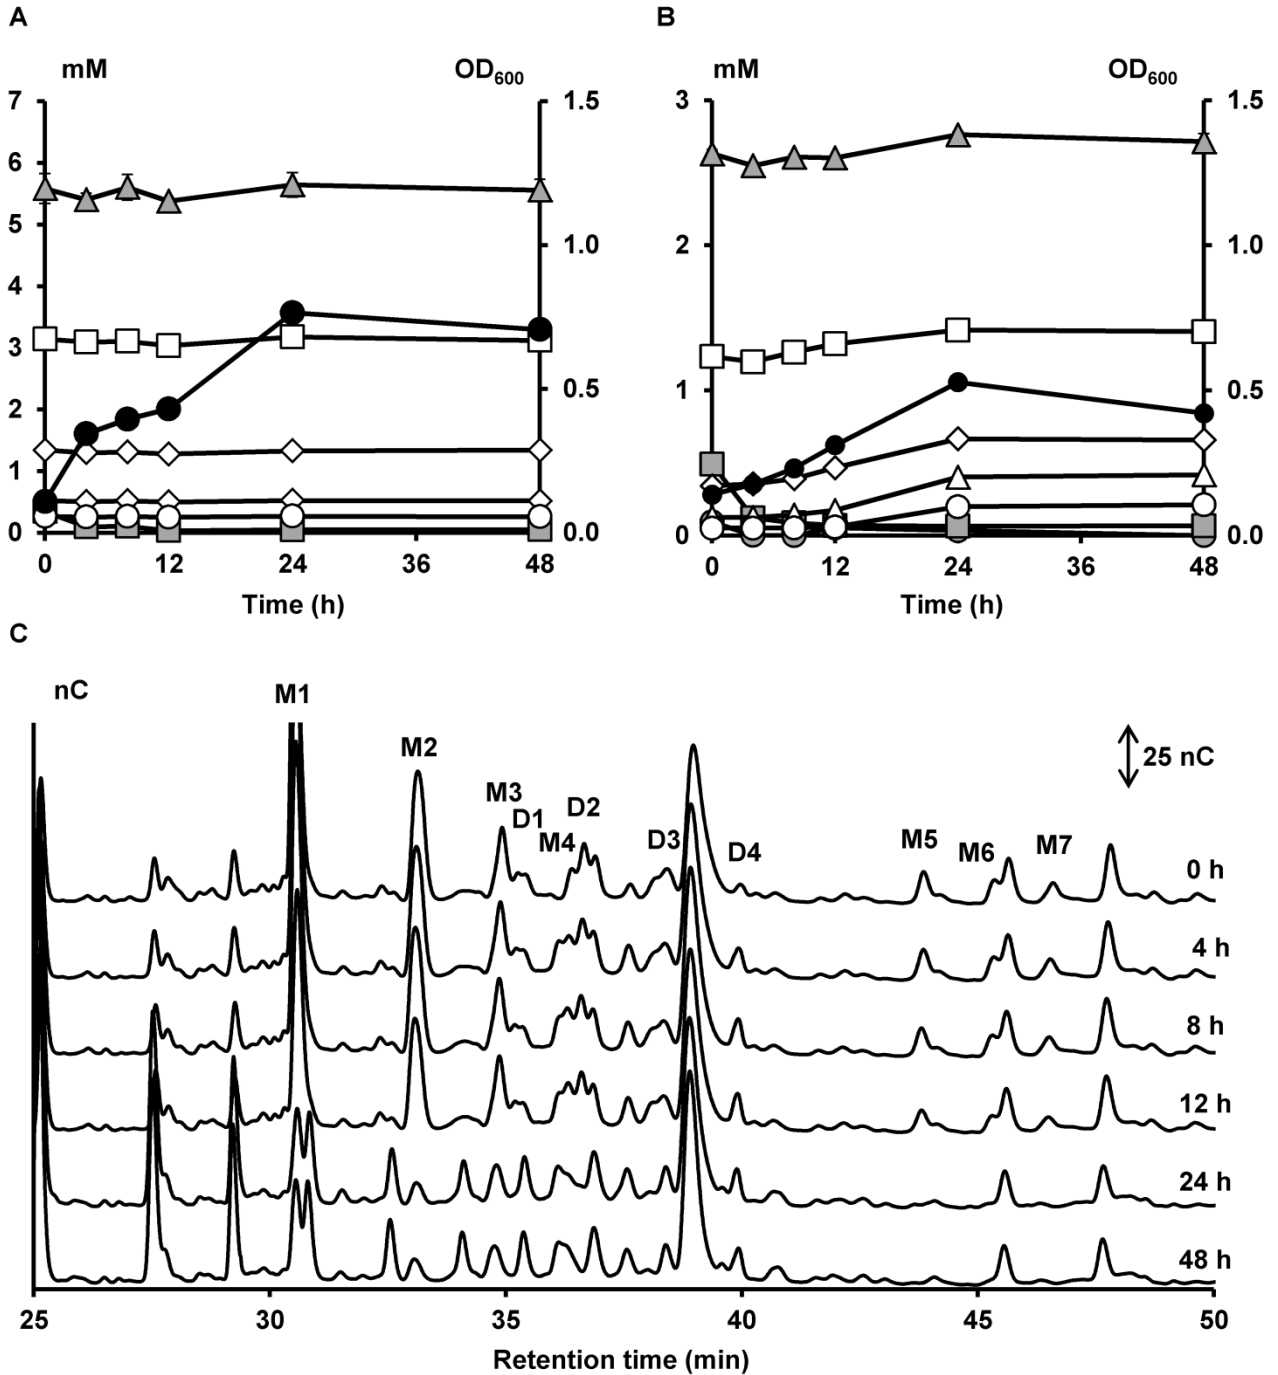

**Figure S2.D.** Growth of and carbohydrate degradation by *Bifidobacterium longum* subsp. *longum* CUETM 172 in a medium for colon bacteria with 5 g L<sup>-1</sup> of XOS (A) or 5 g L<sup>-1</sup> of (A)XOS (B and C) as a function of time (samples taken at 0, 4, 8, 12, 24, and 48 h). Peaks and symbols are named as in Figure S2.A.



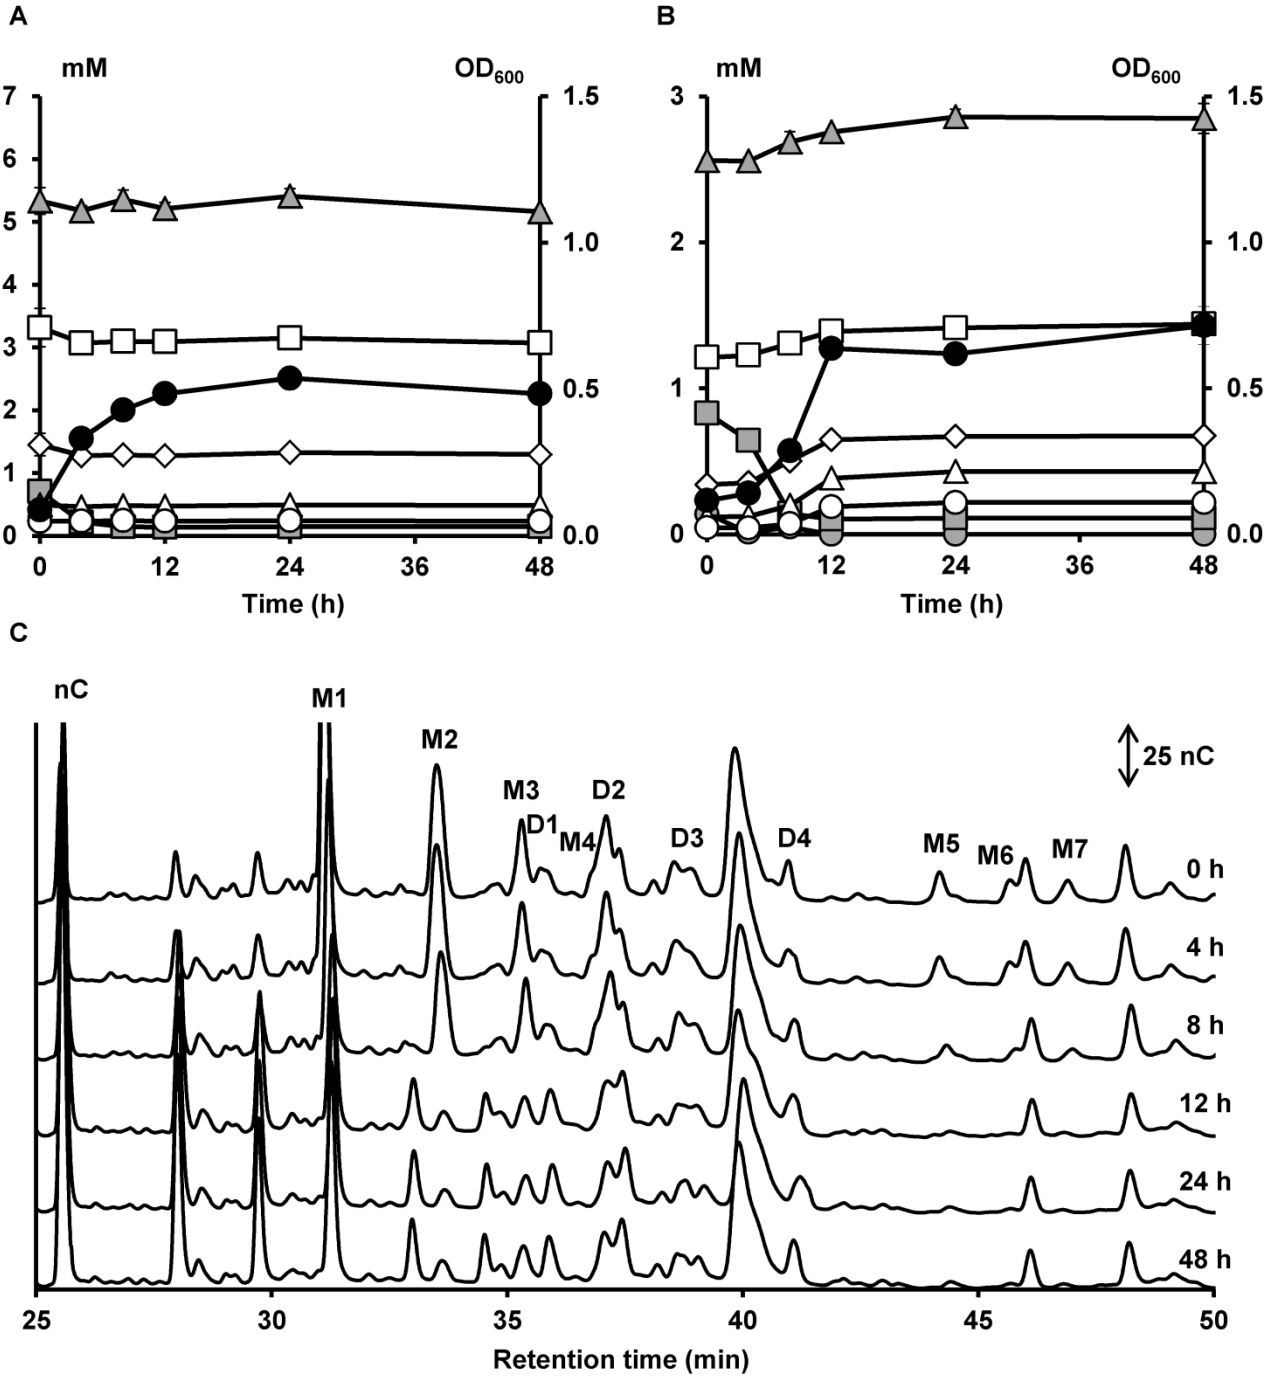

**Figure S2.E.** Growth of and carbohydrate degradation by *Bifidobacterium longum* subsp. *longum* PRO-16-10 in a medium for colon bacteria with 5 g L<sup>-1</sup> of XOS (A) or 5 g L<sup>-1</sup> of (A)XOS (B and C) as a function of time (samples taken at 0, 4, 8, 12, 24, and 48 h). Peaks and symbols are named as in Figure S2.A.

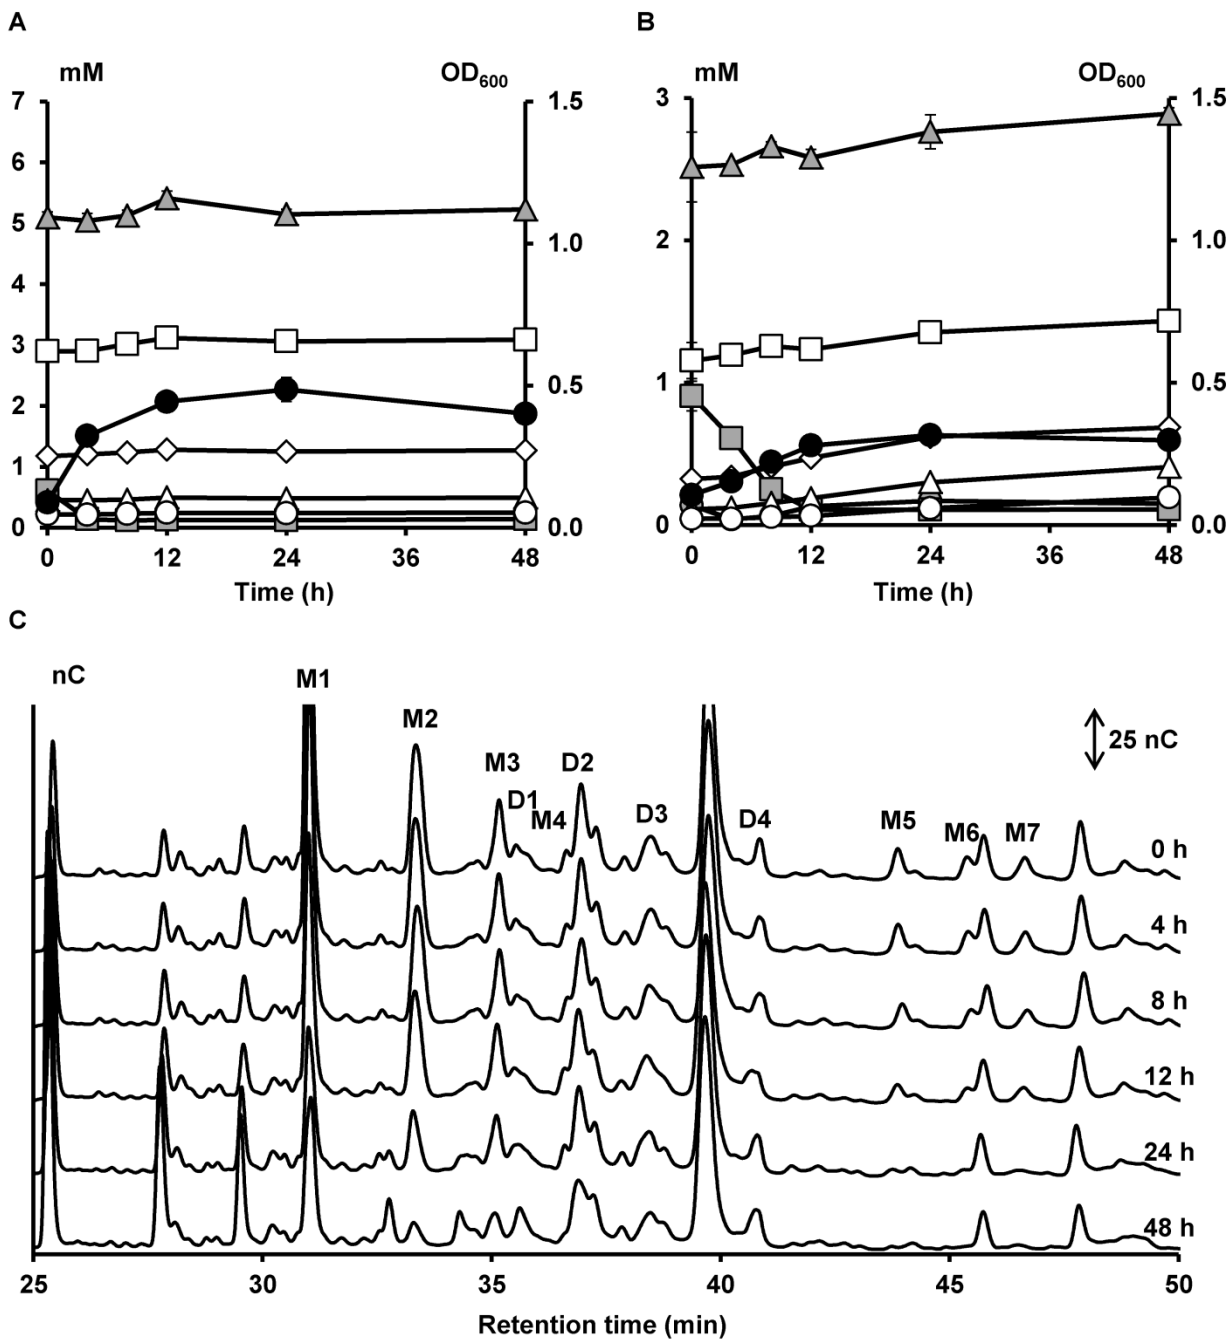

**Figure S2.F.** Growth of and carbohydrate degradation by *Bifidobacterium longum* subsp. *longum* CUETM 290 in a medium for colon bacteria with 5 g L<sup>-1</sup> of XOS (A) or 5 g L<sup>-1</sup> of (A)XOS (B and C) as a function of time (samples taken at 0, 4, 8, 12, 24, and 48 h). Peaks and symbols are named as in Figure S2.A.

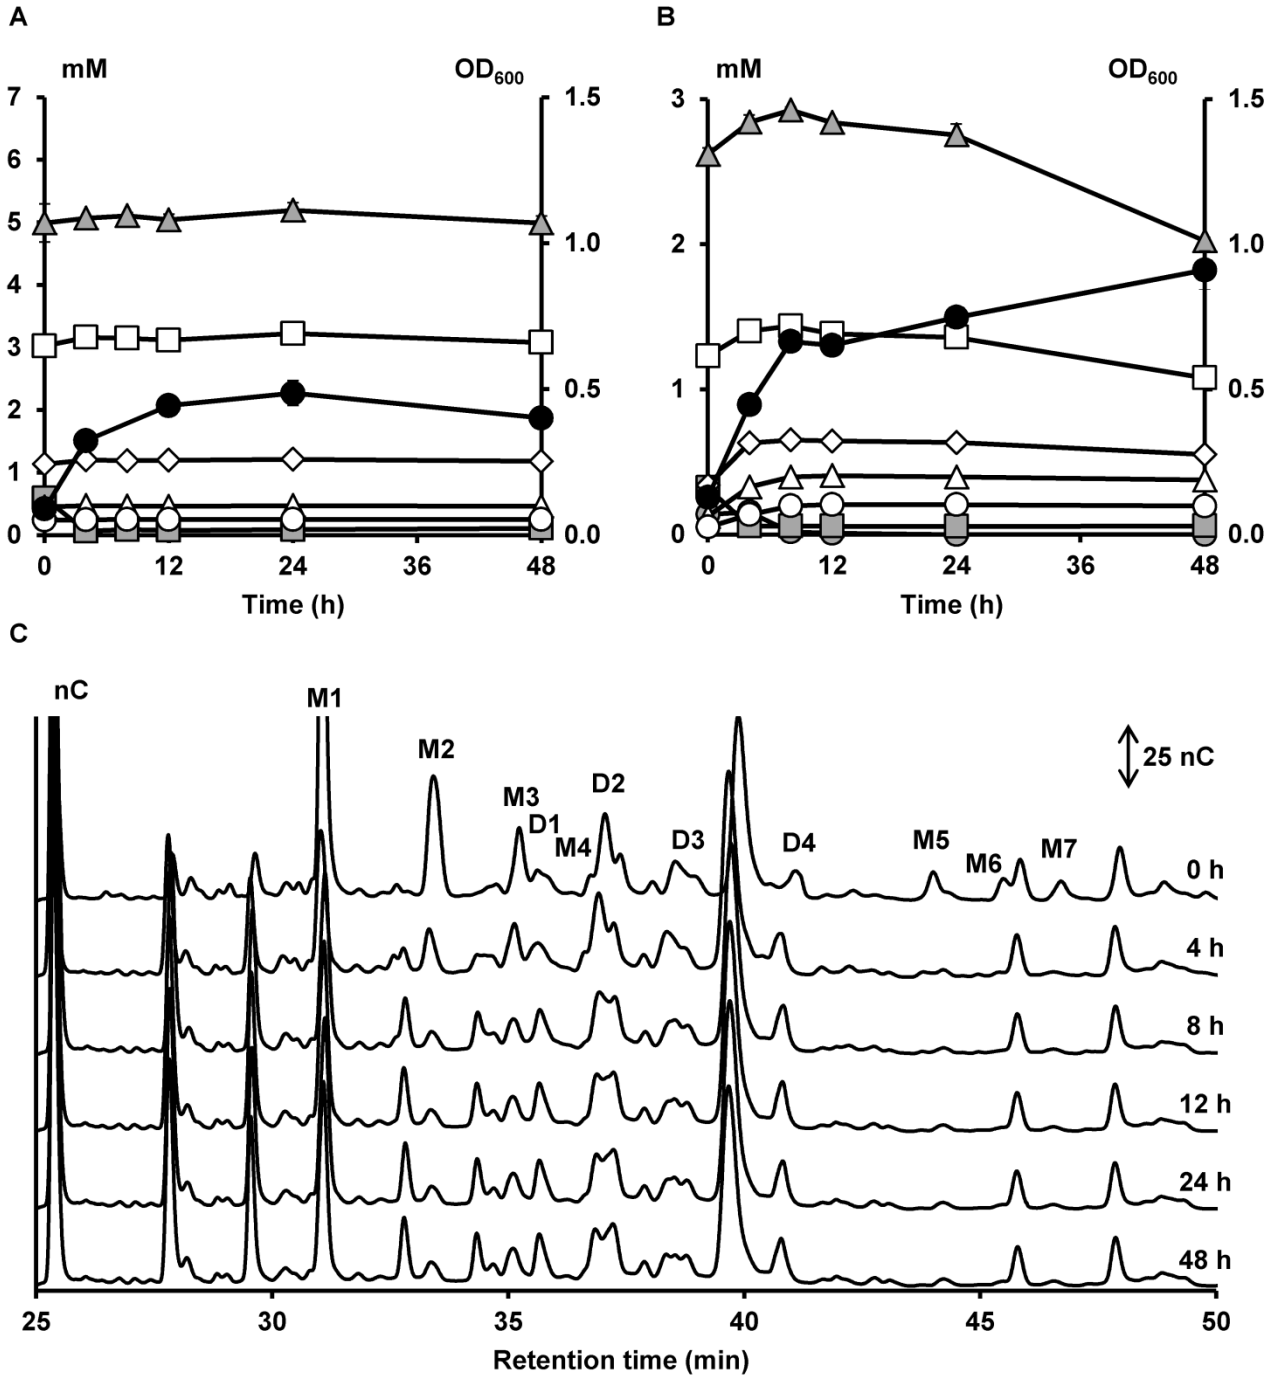

**Figure S2.G.** Growth of and carbohydrate degradation by *Bifidobacterium longum* subsp. *longum* CUETM 171 in a medium for colon bacteria with 5 g L<sup>-1</sup> of XOS (A) or 5 g L<sup>-1</sup> of (A)XOS (B and C) as a function of time (samples taken at 0, 4, 8, 12, 24, and 48 h). Peaks and symbols are named as in Figure S2.A.

Figures S3. Carbohydrate degradation by bifidobacterial strains belonging to cluster III.

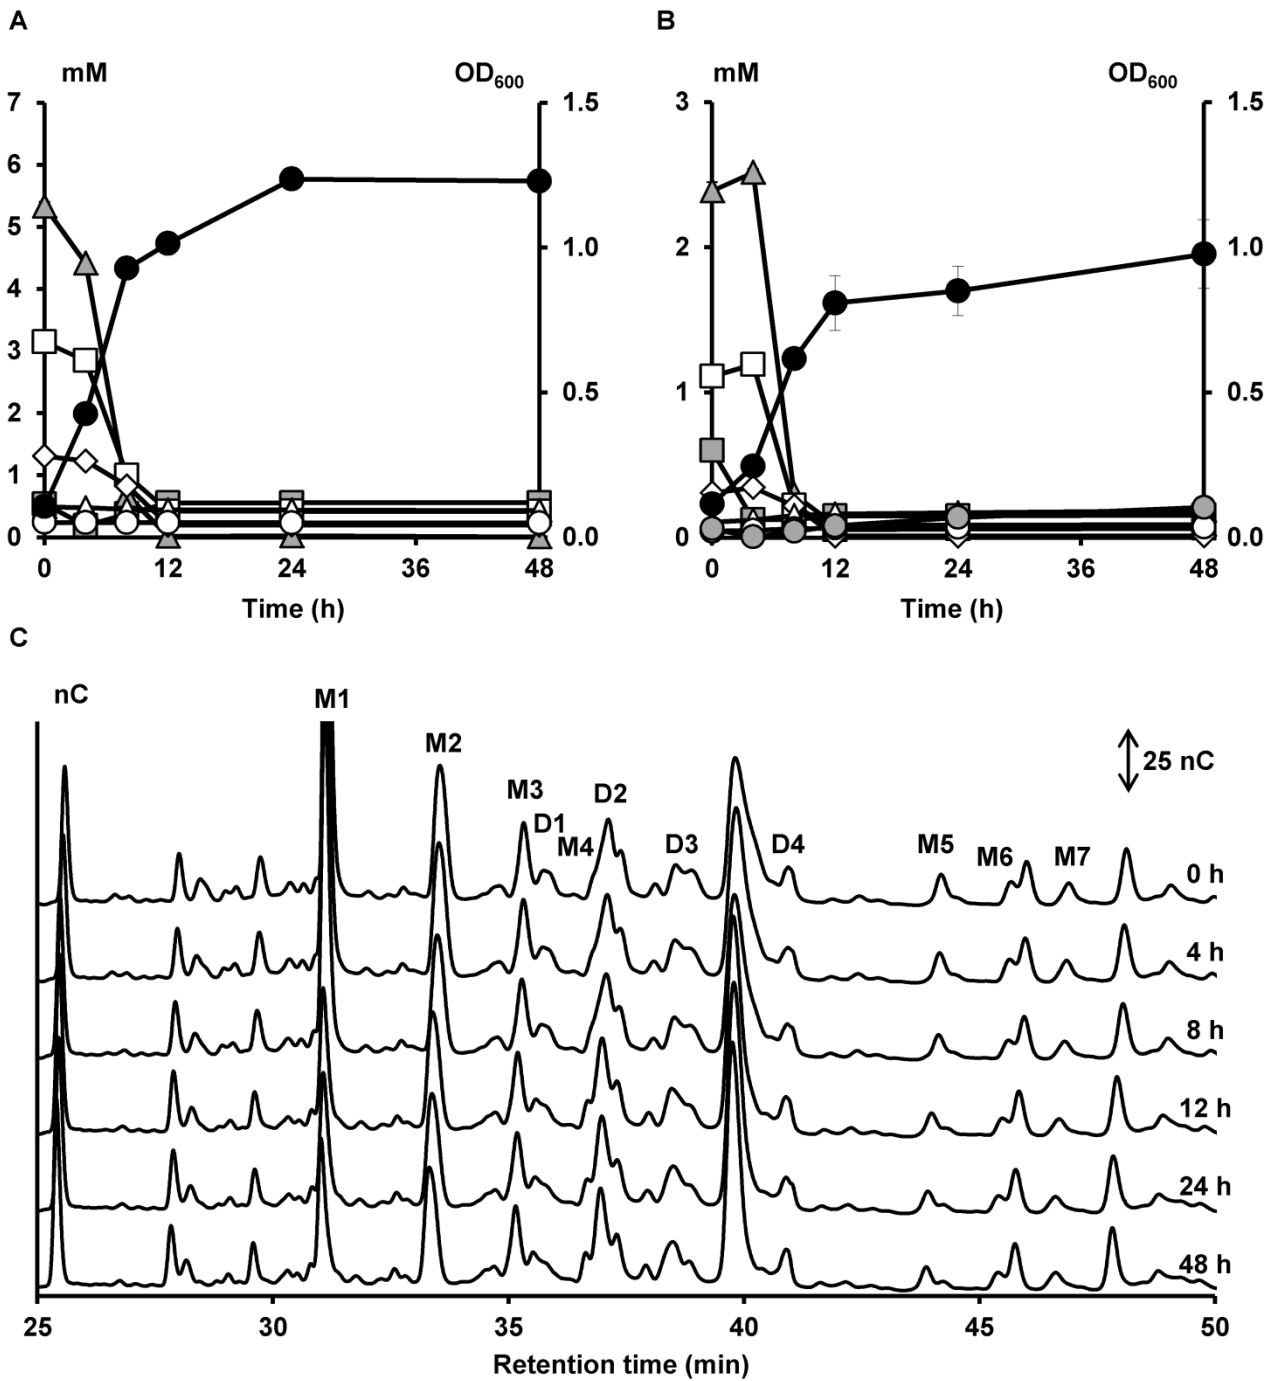

**Figure S3.A.** Growth of and carbohydrate degradation by *Bifidobacterium longum* subsp. *longum* CUETM 239 in a medium for colon bacteria with 5 g L<sup>-1</sup> of XOS (A) or 5 g L<sup>-1</sup> of (A)XOS (B and C) as a function of time (samples taken at 0, 4, 8, 12, 24, and 48 h). Growth is represented as OD<sub>600</sub> measurements (●). Monosaccharide, XOS, and XOS<sub>(A)</sub>XOS consumption are represented as

residual concentrations of arabinose (●), xylose (■), xylobiose (▲), xylotriose (□), xylohexaose (◇), xylopentaose (Δ), and xylohexaose (○) in mM. (C) represents an enlargement of the AXOS HPAEC-PAD chromatograms between 25.0 and 50.0 min of elution. D1-D4, AXOS peaks containing at least one doubly substituted Xylp residue. M1-M7, AXOS peaks containing at least one monosubstituted Xylp residue.

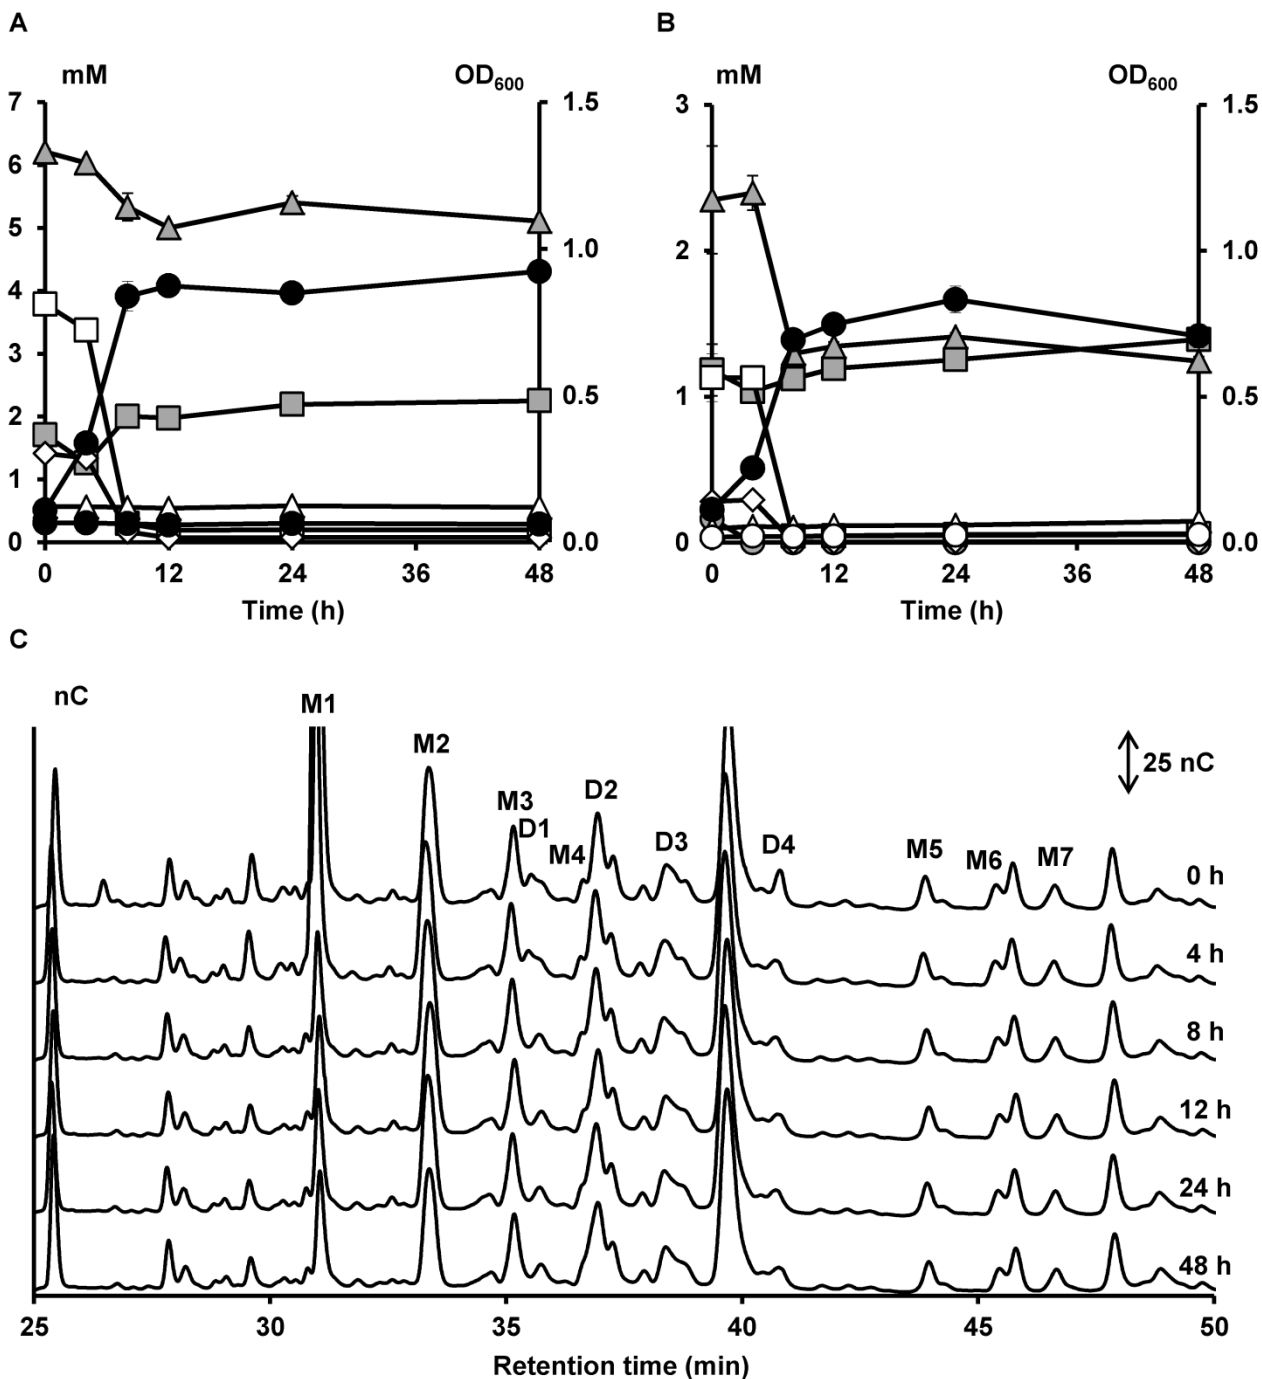

**Figure S3.B.** Growth of and carbohydrate degradation by *Bifidobacterium pseudolongum* subsp. *pseudolongum* LMG 11594 in a medium for colon bacteria with 5 g L<sup>-1</sup> of XOS (A) or 5 g L<sup>-1</sup> of (A)XOS (B and C) as a function of time (samples taken at 0, 4, 8, 12, 24, and 48 h). Peaks and symbols are named as in Figure S3.A.

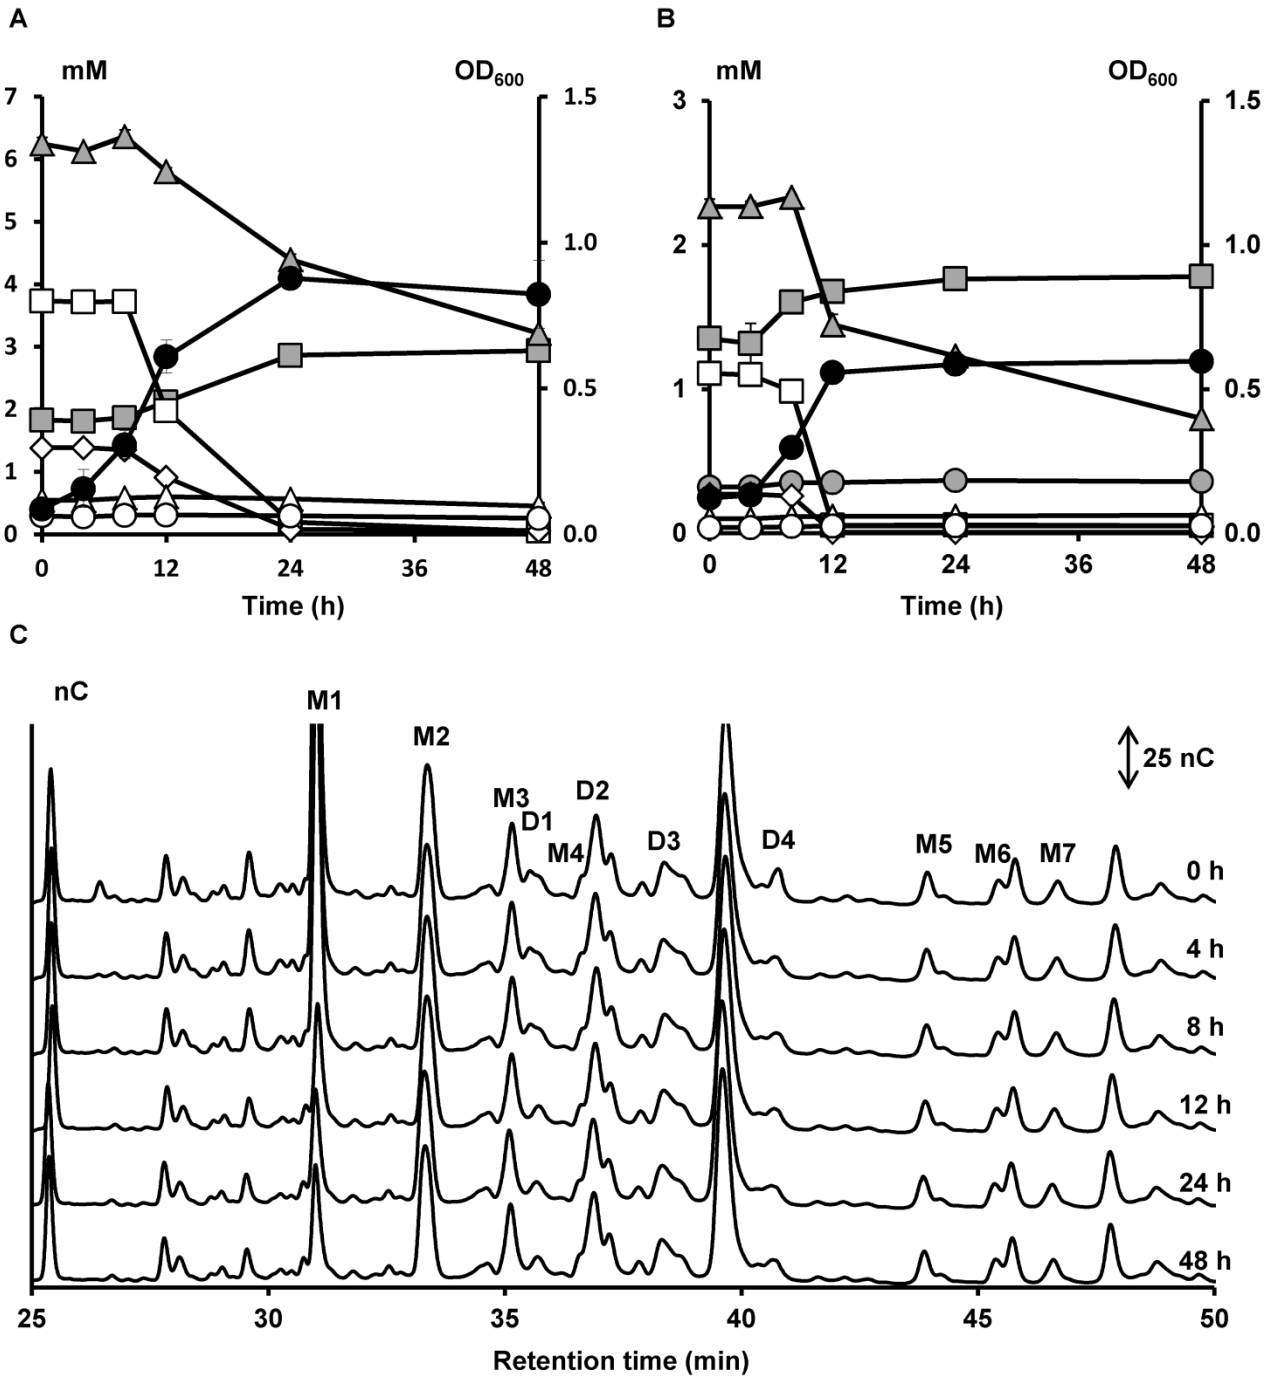

**Figure S3.C.** Growth of and carbohydrate degradation by *Bifidobacterium pseudolongum* subsp. *globosum* LMG 11614 in a medium for colon bacteria with 5 g L<sup>-1</sup> of XOS (A) or 5 g L<sup>-1</sup> of (A)XOS (B and C) as a function of time (samples taken at 0, 4, 8, 12, 24, and 48 h). Peaks and symbols are named as in Figure S3.A.

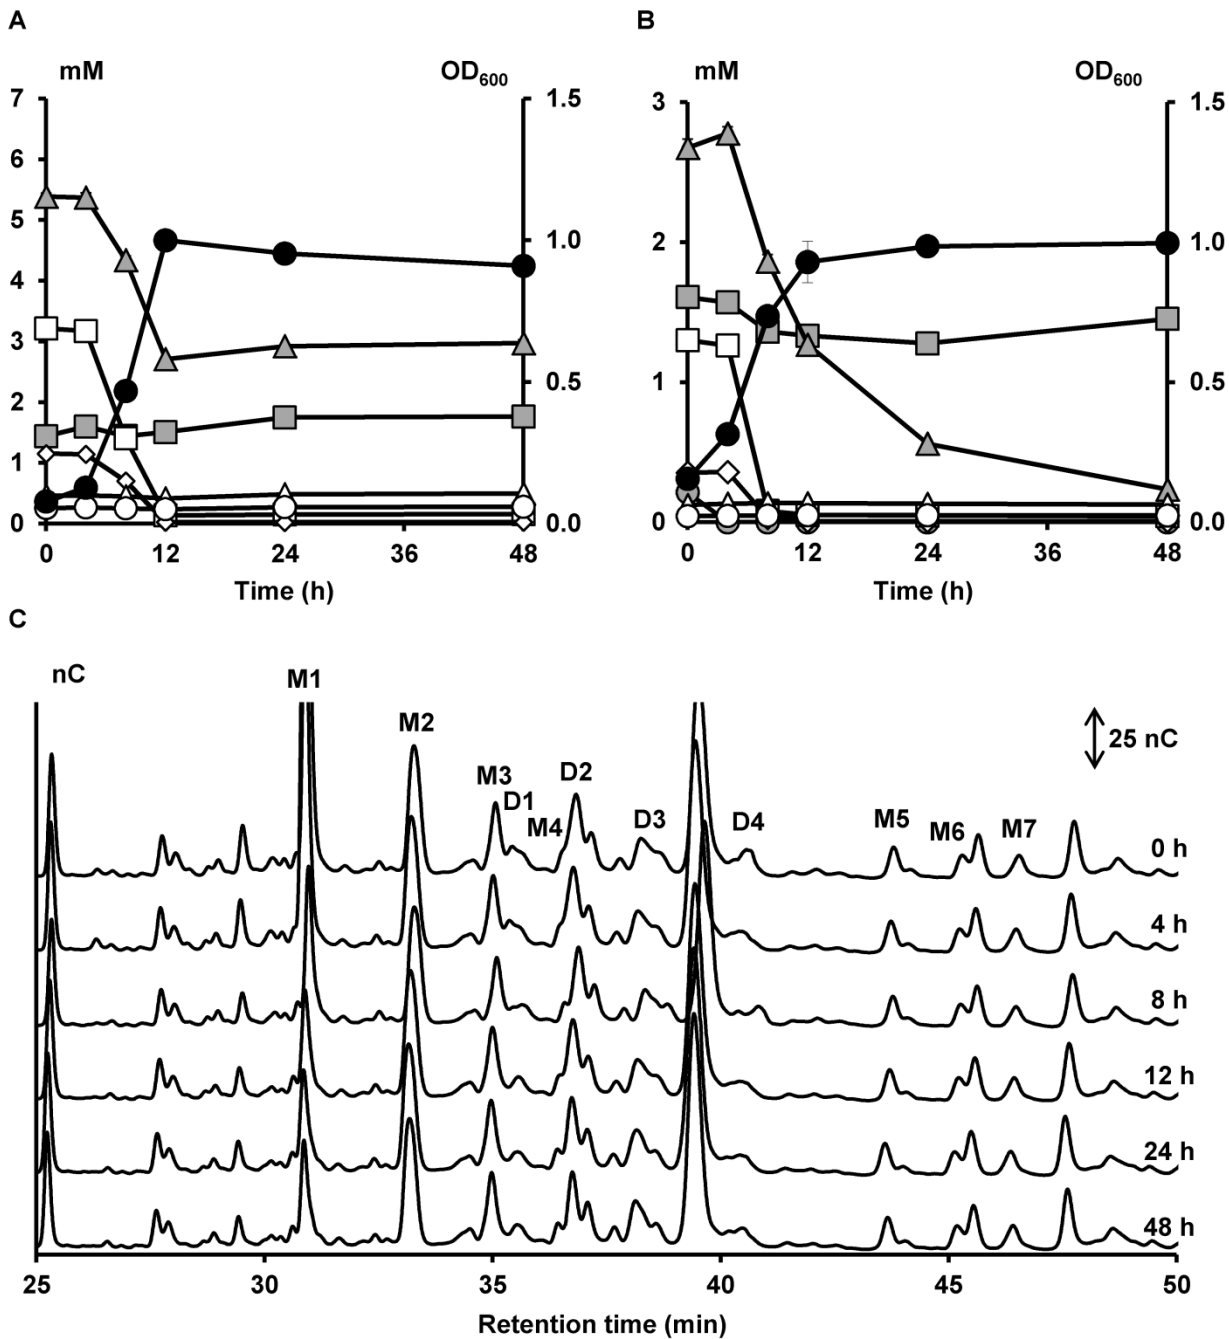

**Figure S3.D.** Growth of and carbohydrate degradation by *Bifidobacterium animalis* subsp. *lactis* DN-173 010 in a medium for colon bacteria with 5 g L<sup>-1</sup> of XOS (A) or 5 g L<sup>-1</sup> of (A)XOS (B and C) as a function of time (samples taken at 0, 4, 8, 12, 24, and 48 h). Peaks and symbols are named as in Figure S3.A.



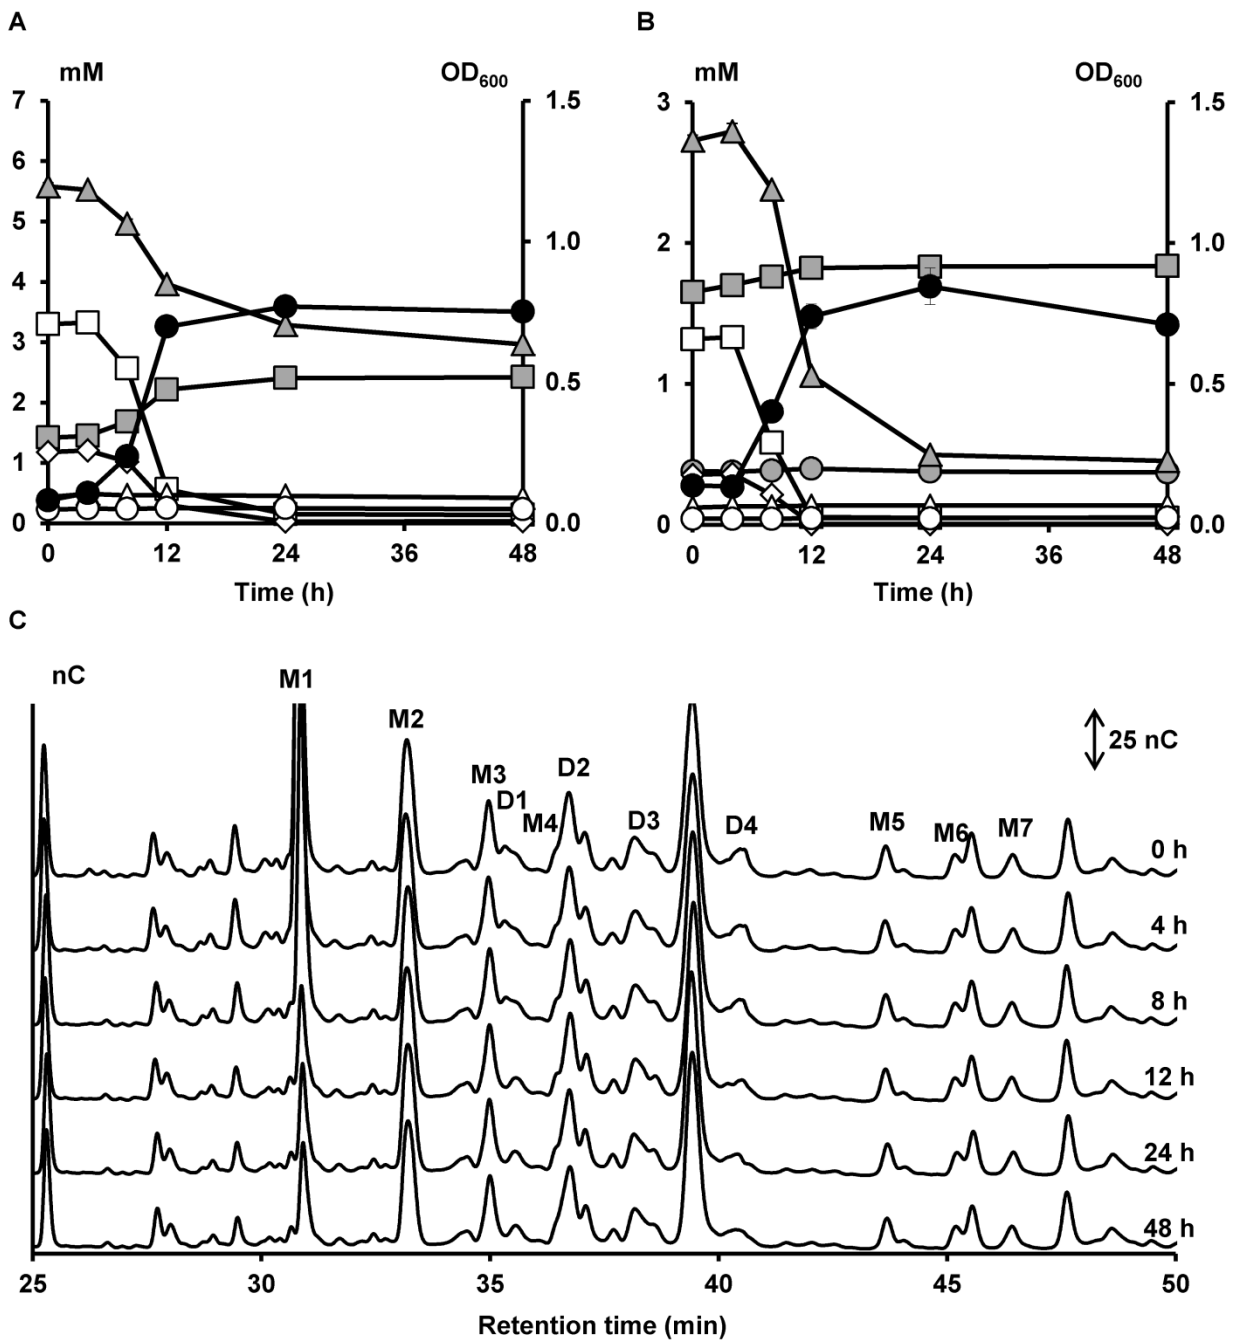

**Figure S3.E.** Growth of and carbohydrate degradation by *Bifidobacterium animalis* subsp. *lactis* R-17143 in a medium for colon bacteria with 5 g L<sup>-1</sup> of XOS (A) or 5 g L<sup>-1</sup> of (A)XOS (B and C) as a function of time (samples taken at 0, 4, 8, 12, 24, and 48 h). Peaks and symbols are named as in Figure S3.A.

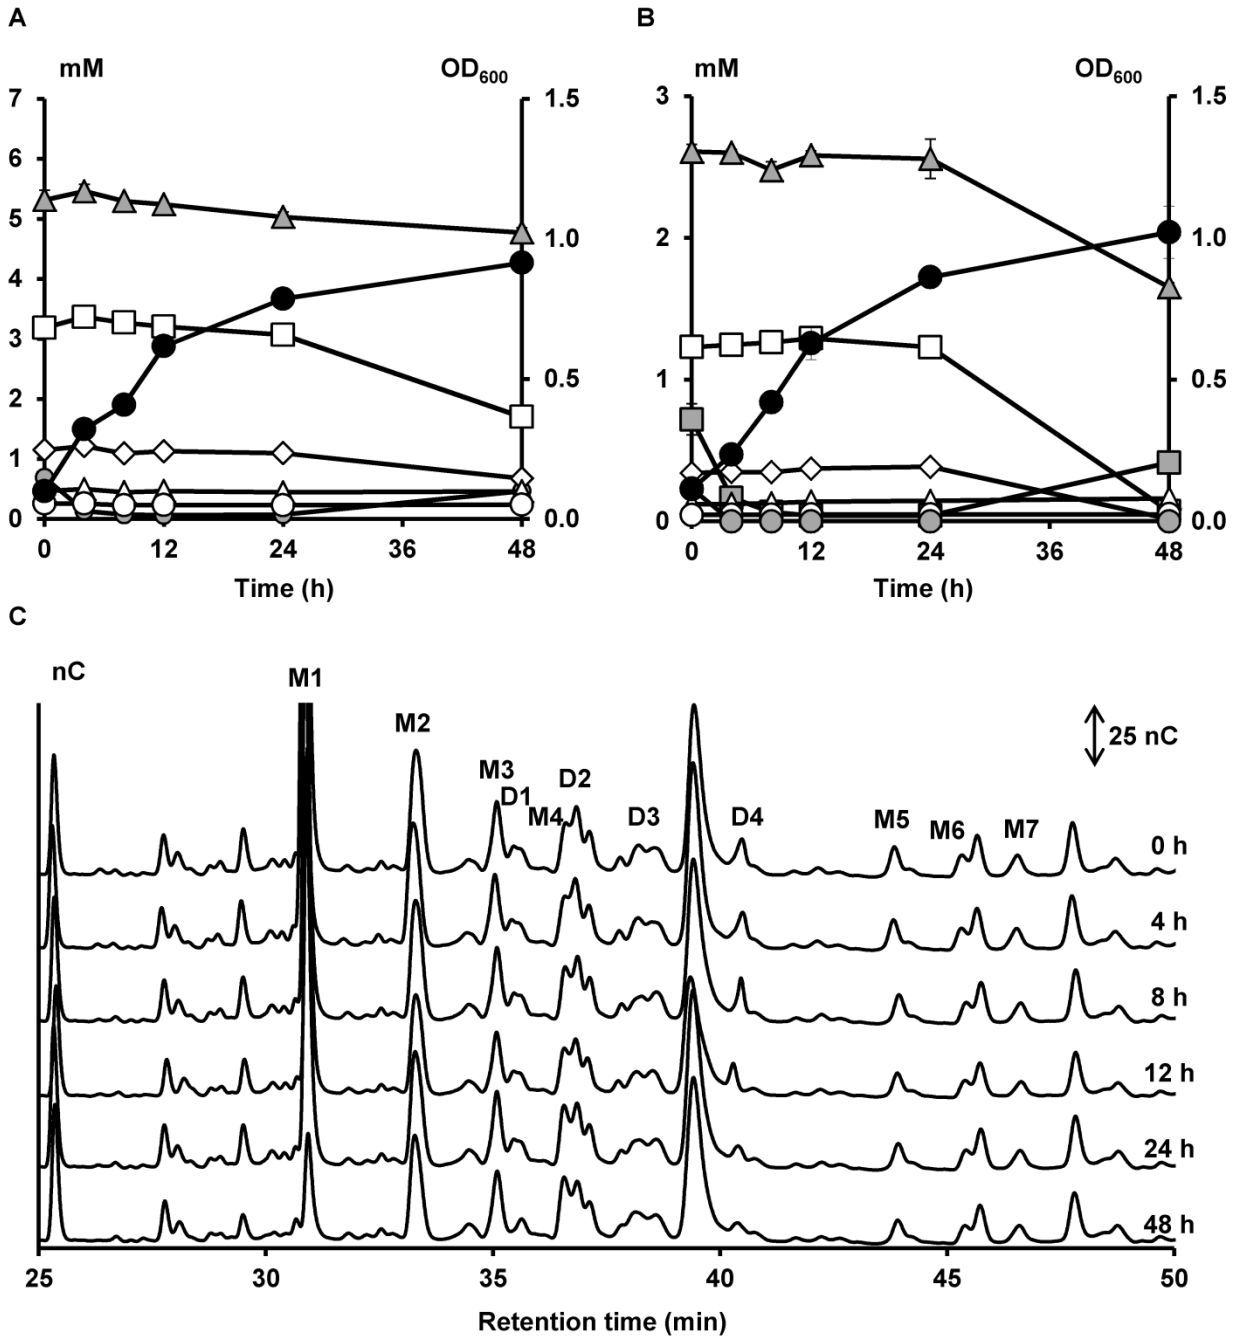

**Figure S3.F.** Growth of and carbohydrate degradation by *Bifidobacterium animalis* subsp. *lactis* BB-12 in a medium for colon bacteria with 5 g L<sup>-1</sup> of XOS (A) or 5 g L<sup>-1</sup> of (A)XOS (B and C) as a function of time (samples taken at 0, 4, 8, 12, 24, and 48 h). Peaks and symbols are named as in Figure S3.A.

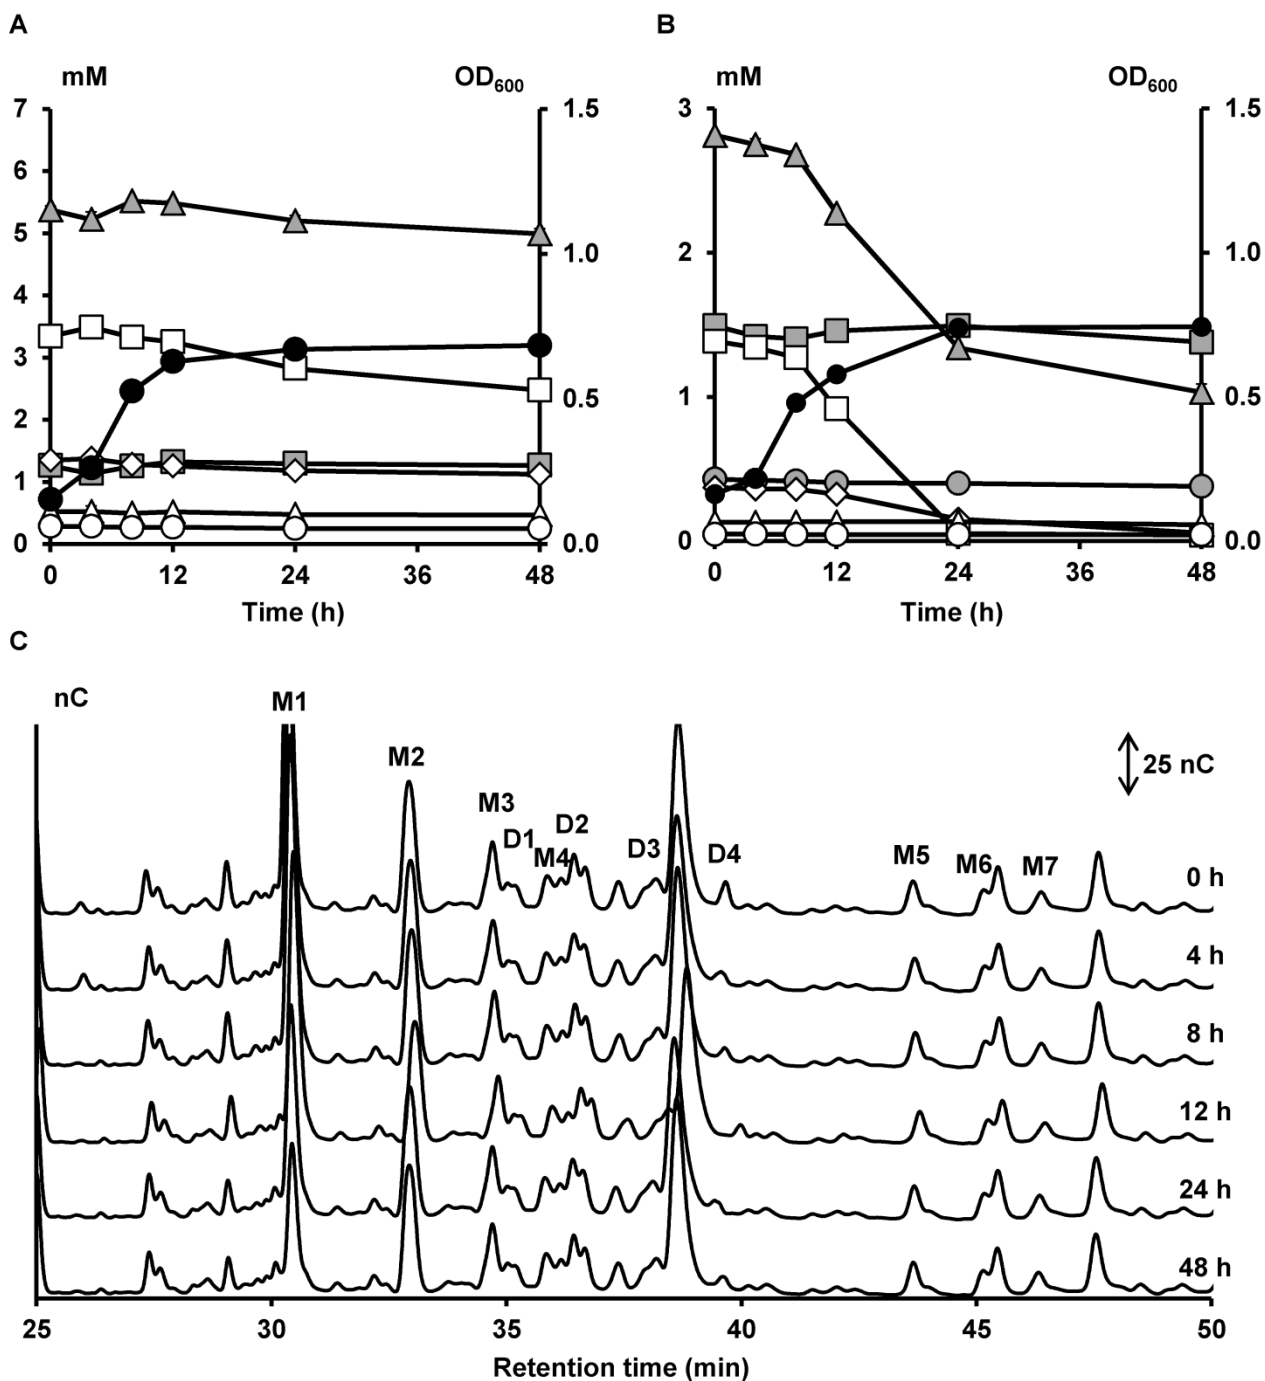

**Figure S3.G.** Growth of and carbohydrate degradation by *Bifidobacterium gallicum* LMG 11596<sup>T</sup> in a medium for colon bacteria with 5 g L<sup>-1</sup> of XOS (A) or 5 g L<sup>-1</sup> of (A)XOS (B and C) as a function of time (samples taken at 0, 4, 8, 12, 24, and 48 h). Peaks and symbols are named as in Figure S3.A.

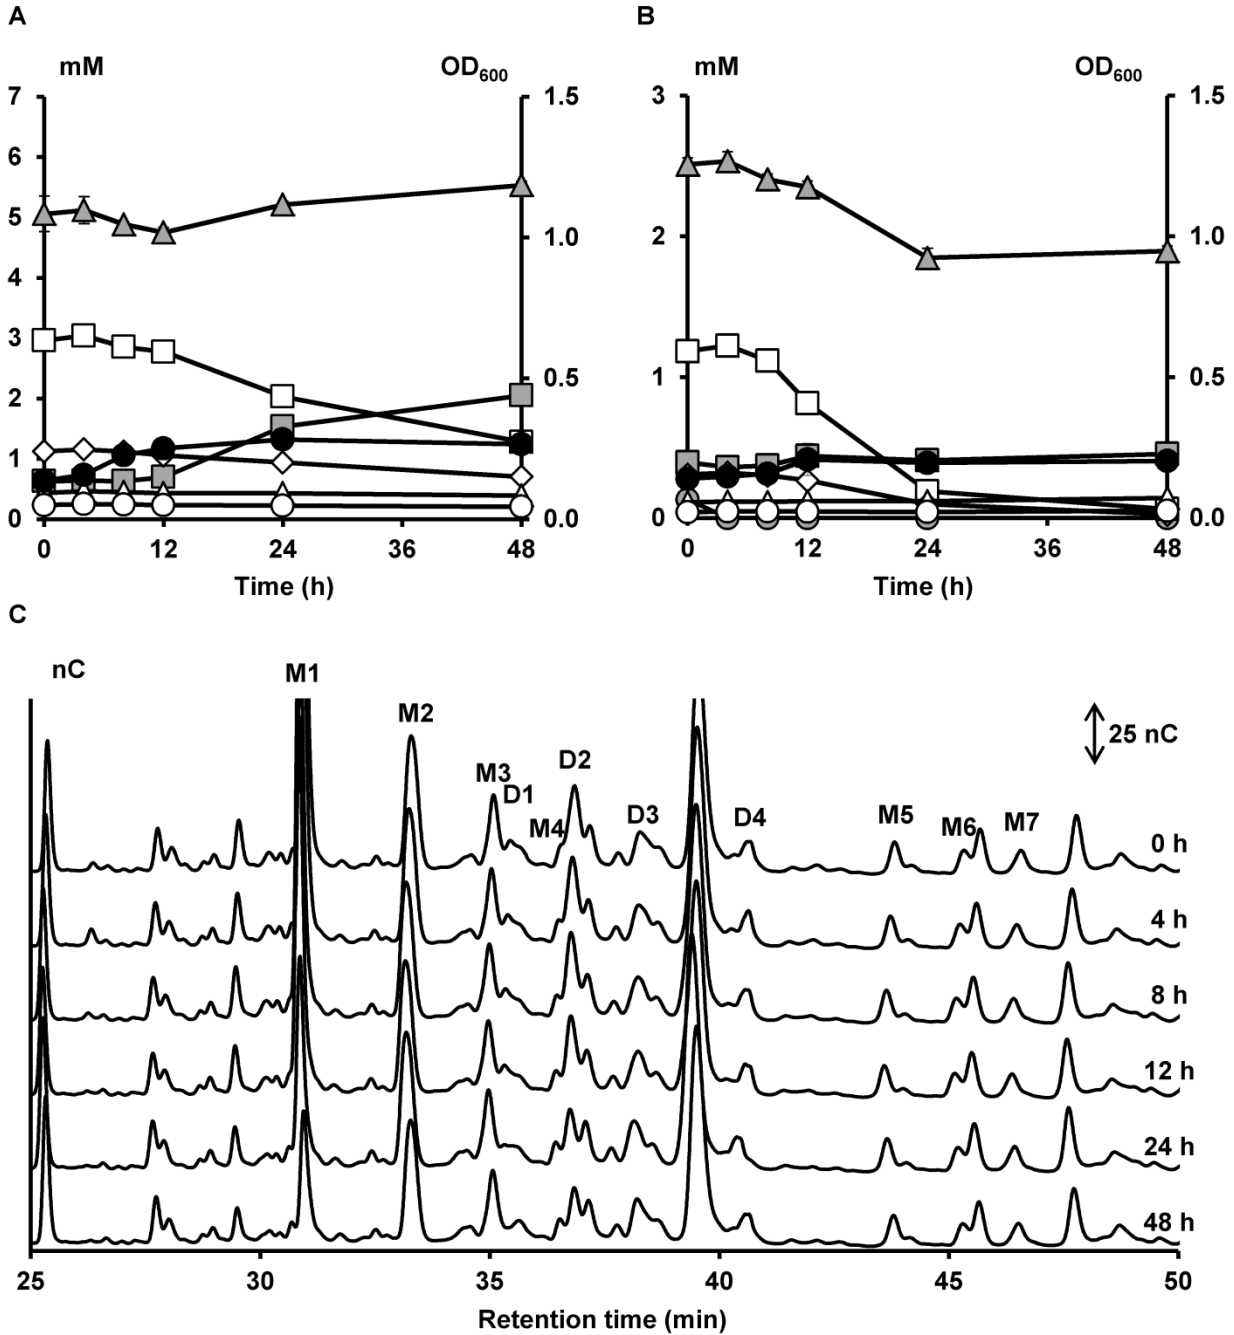

**Figure S3.H.** Growth of and carbohydrate degradation by *Bifidobacterium angulatum* LMG 11039<sup>T</sup> in a medium for colon bacteria with 5 g L<sup>-1</sup> of XOS (A) or 5 g L<sup>-1</sup> of (A)XOS (B and C) as a function of time (samples taken at 0, 4, 8, 12, 24, and 48 h). Peaks and symbols are named as in Figure S3.A.

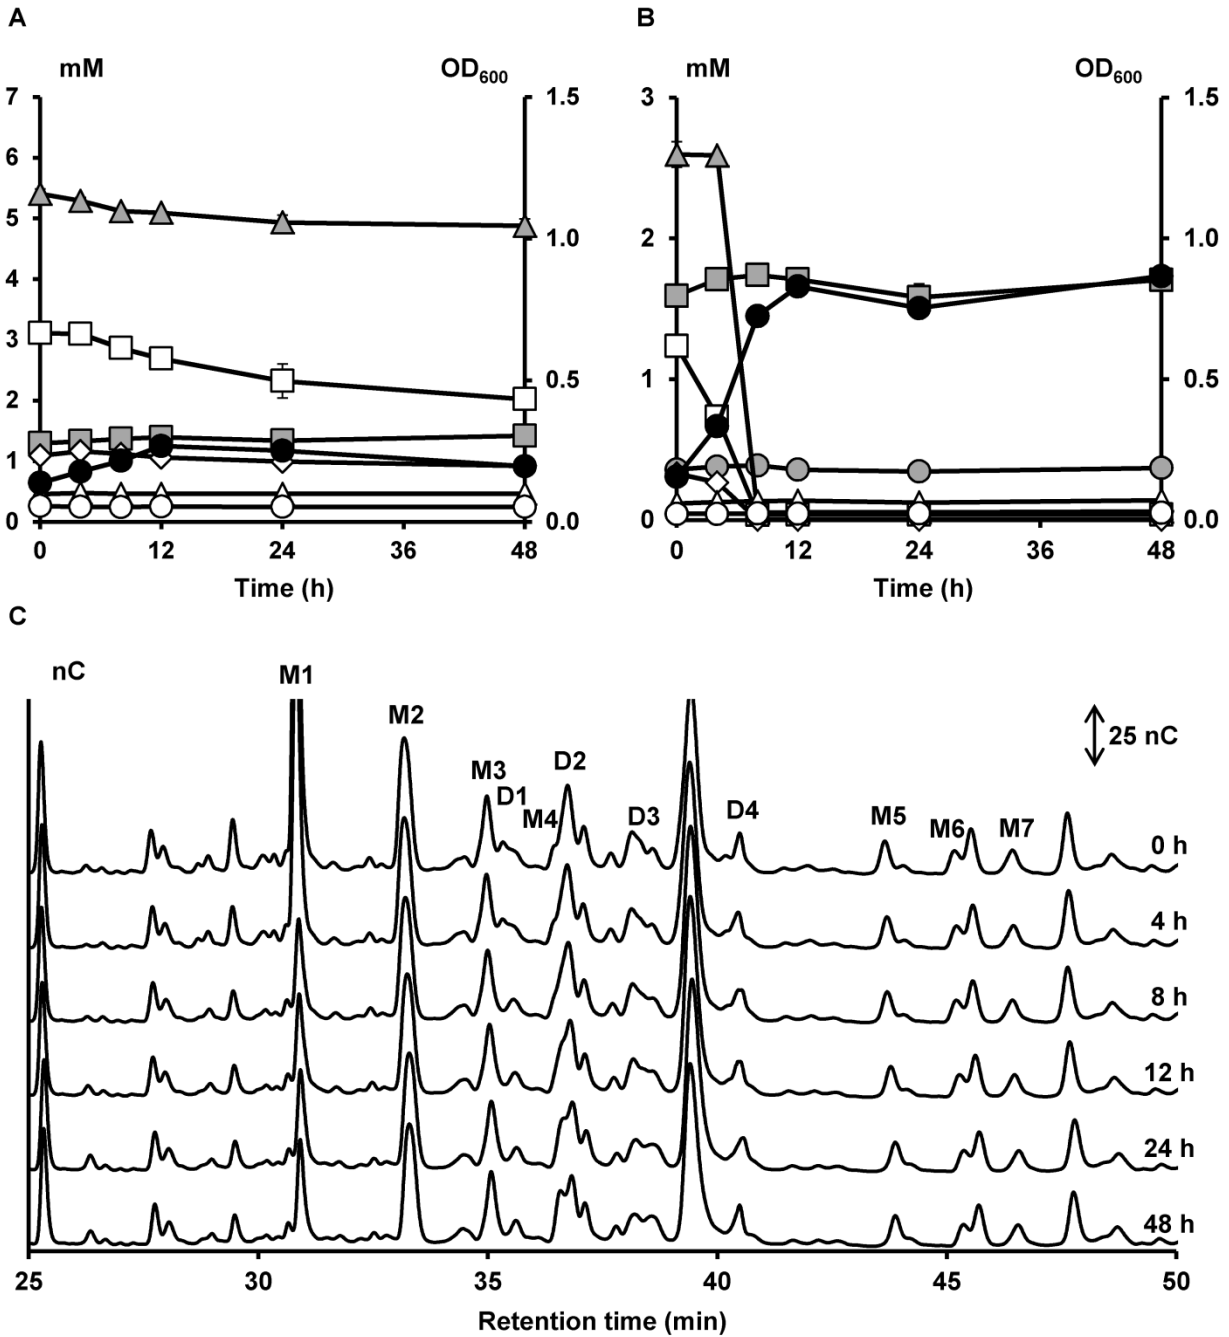

**Figure S3.I.** Growth of and carbohydrate degradation by *Bifidobacterium adolescentis* LMG 10502<sup>T</sup> in a medium for colon bacteria with 5 g L<sup>-1</sup> of XOS (A) or 5 g L<sup>-1</sup> of (A)XOS (B and C) as a function of time (samples taken at 0, 4, 8, 12, 24, and 48 h). Peaks and symbols are named as in Figure S3.A.

**Figure S4.** Carbohydrate degradation by bifidobacterial strains belonging to cluster IV.

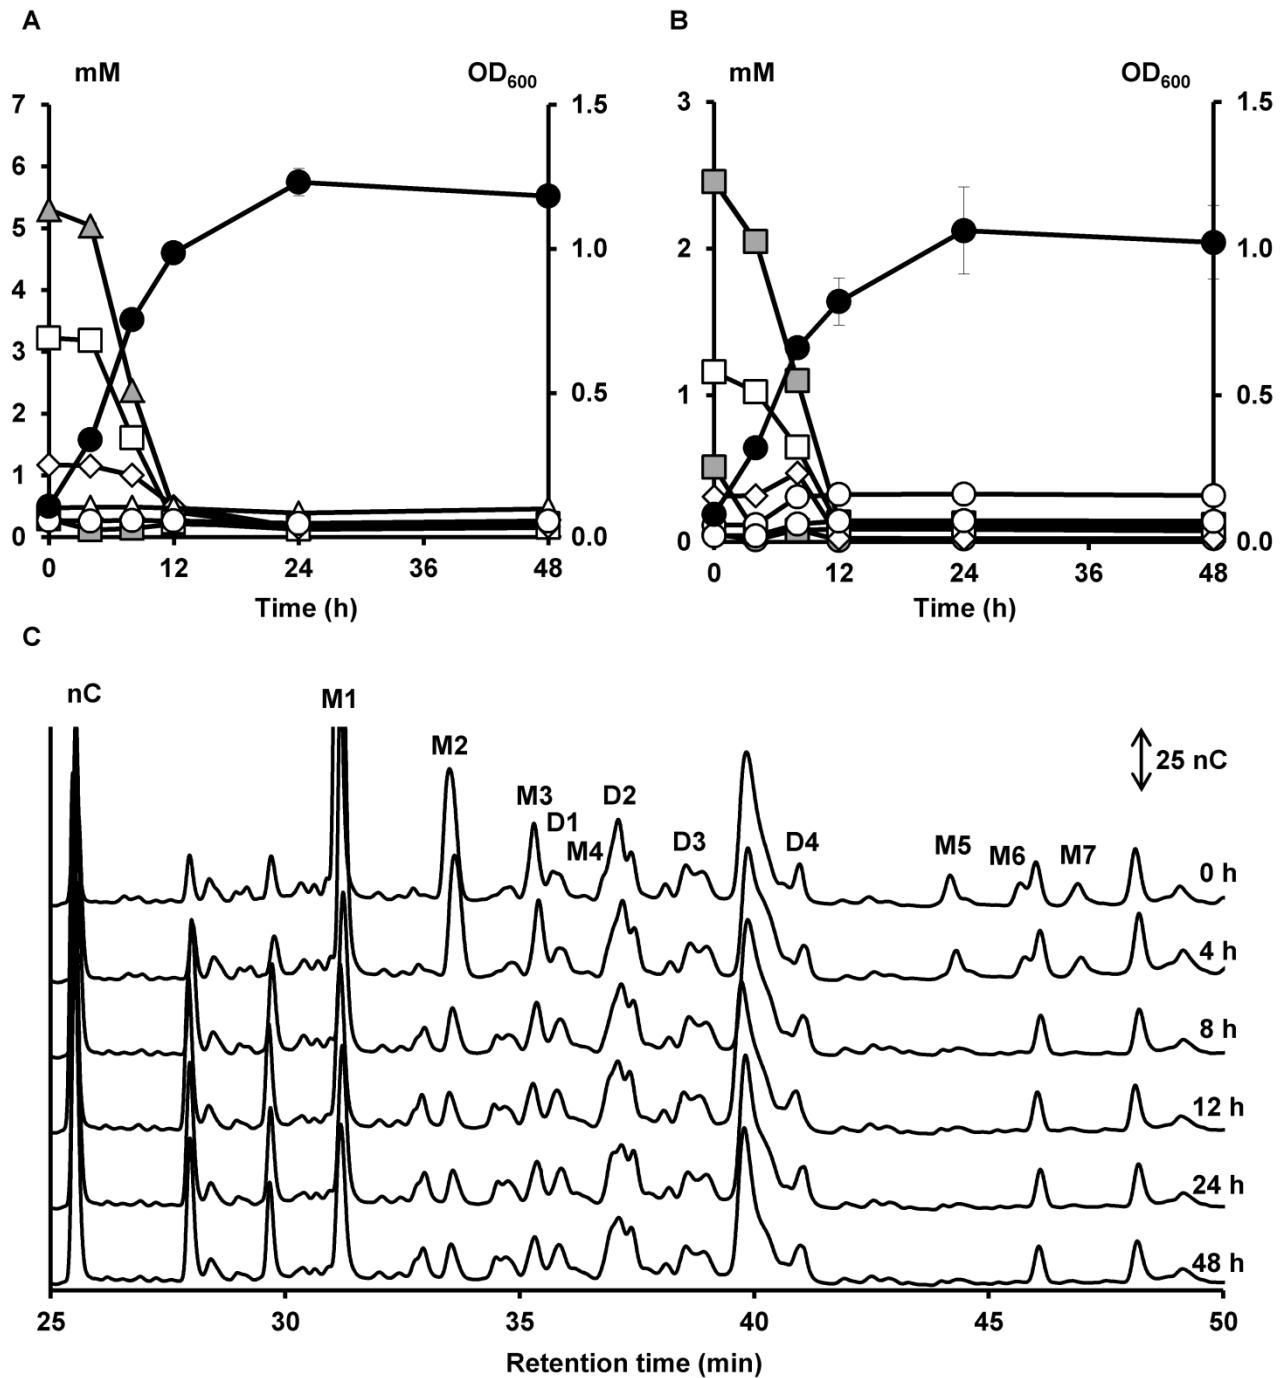

**Figure S4.A.** Growth of and carbohydrate degradation by *Bifidobacterium longum* subsp. *longum* CUETM 193 in a medium for colon bacteria with 5 g L<sup>-1</sup> of XOS (A) or 5 g L<sup>-1</sup> of (A)XOS (B and C) as a function of time (samples taken at 0, 4, 8, 12, 24, and 48 h). Growth is represented as OD<sub>600</sub> measurements (●). Monosaccharide, XOS, and XOS<sub>(A)XOS</sub> consumption are represented as

residual concentrations of arabinose (●), xylose (■), xylobiose (▲), xylotriose (□), xylotetraose (◇), xylopentaose (Δ), and xylohexaose (○) in mM. (C) represents an enlargement of the AXOS HPAEC-PAD chromatograms between 25.0 and 50.0 min of elution. D1-D4, AXOS peaks containing at least one doubly substituted Xylp residue. M1-M7, AXOS peaks containing at least one monosubstituted Xylp residue.
